# Supplementary material for: Synthesis and Antibacterial Activity Studies of the Conjugates of Curcumin with closo-Dodecaborate and Cobalt Bis(Dicarbollide) Boron Clusters
Source: MDPI journal article supplement (doi:10.3390/molecules27092920), 2022-05-03
Supplement: s1 [file s1]

## SUPPORTING INFORMATION

# Synthesis and Antibacterial Activity Studies of the Conjugates of Curcumin with *closo*-Dodecaborate and Cobalt Bis(Dicarbollide) Boron Clusters §

Anna A. Druzina <sup>1,\*</sup>, Natalia E. Grammatikova <sup>2</sup>, Olga B. Zhidkova <sup>1</sup>, Anastasia A. Nekrasova <sup>1,3</sup>, Nadezhda V. Dudarova <sup>1</sup>, Irina D. Kosenko <sup>1</sup>, Mikhail A. Grin <sup>3</sup>, Vladimir I. Bregadze <sup>1</sup>

<sup>1</sup> A.N. Nesmeyanov Institute of Organoelement Compounds, Russian Academy of Sciences, 28 Vavilov Str., 119991 Moscow, Russia; [nekrasova\\_na@list.ru](mailto:nekrasova_na@list.ru) (N.A.N); [nadezjdino\\_96@mail.ru](mailto:nadezjdino_96@mail.ru) (N.V.D.); [Zolga57@mail.ru](mailto:Zolga57@mail.ru) (O.B.Z.); [kosenko@ineos.ac.ru](mailto:kosenko@ineos.ac.ru) (I.D.K.); [sivaev@ineos.ac.ru](mailto:sivaev@ineos.ac.ru) (I.B.S.); [bre@ineos.ac.ru](mailto:bre@ineos.ac.ru) (V.I.B)

<sup>2</sup> Gause Institute of New Antibiotics, 11 B. Pirogovskaya, 119021, Moscow, Russia; [ngrammatikova@yandex.ru](mailto:ngrammatikova@yandex.ru) (NEG)

<sup>3</sup> M.V. Lomonosov Institute of Fine Chemical Technology, MIREA – Russian Technological University, 86 Vernadsky Av., 119571 Moscow, Russia; [michael\\_grin@mail.ru](mailto:michael_grin@mail.ru) (M.A.G)

\* Correspondence: [ilinova\\_anna@mail.ru](mailto:ilinova_anna@mail.ru) (A.A.D.); Tel.: +7-926-404-5566

§ Dedicated to Professor Valery Petrosyan on the occasion of his 80th Jubilee and in recognition of his outstanding contributions to physical organic and organometallic chemistry.

<sup>1</sup>H, <sup>11</sup>B and <sup>13</sup>C NMR, IR and high-resolution mass spectra of compounds **4**, **5**, **9-11**

## Display Report

### Analysis Info

Analysis Name D:\Data\Chizhov\INEOS\Bregadze\Laskova\Nov\_01\_2021\_1\da-039\_&clb-.d  
Method tune\_wide\_neg.m  
Sample Name /CHIZ DA-039  
Comment CH3OH 100 %, dil. 2000, calibrant added

Acquisition Date 01.11.2021 13:50:37

Operator BDAL@DE

Instrument / Ser# microTOF 10248

### Acquisition Parameter

|             |            |                      |          |                  |           |
|-------------|------------|----------------------|----------|------------------|-----------|
| Source Type | ESI        | Ion Polarity         | Negative | Set Nebulizer    | 0.4 Bar   |
| Focus       | Not active |                      |          | Set Dry Heater   | 180 °C    |
| Scan Begin  | 50 m/z     | Set Capillary        | 3200 V   | Set Dry Gas      | 4.0 l/min |
| Scan End    | 3000 m/z   | Set End Plate Offset | -500 V   | Set Divert Valve | Waste     |

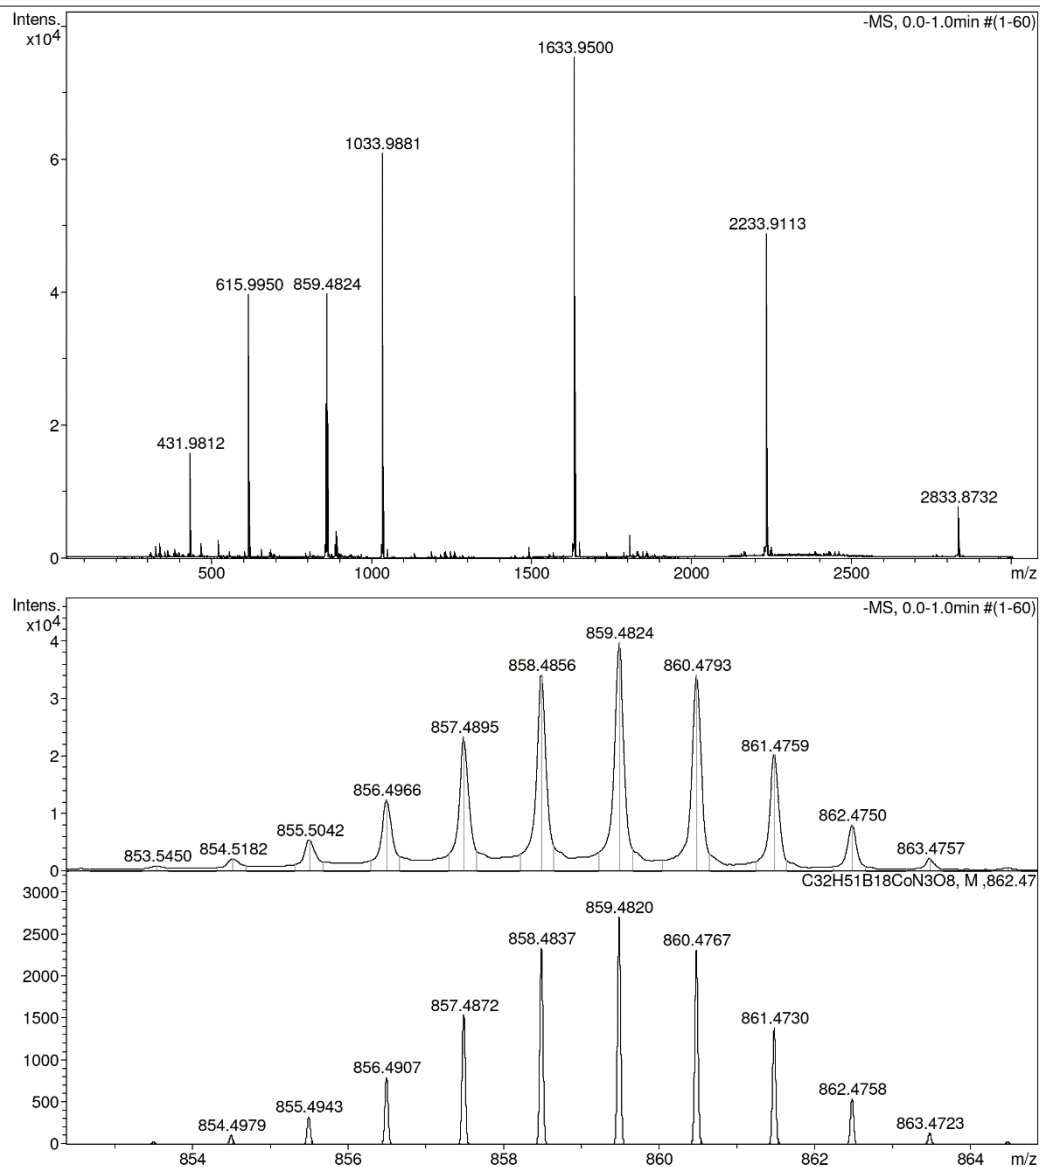

**Figure S1.** ESI-HRMS spectrum of compound 4

## Display Report

### Analysis Info

Analysis Name D:\Data\Chizhov\INEOS\Bregadze\Druzina\Jan\_17\_2022\da-047\_&clb-.d  
Method tune\_wide\_neg.m  
Sample Name /CHIZ DA-047  
Comment CH3CN 100 %, dil. 200, calibrant added

Acquisition Date 17.01.2022 18:56:24

Operator BDAL@DE

Instrument / Ser# microTOF 10248

### Acquisition Parameter

|             |            |                      |          |                  |           |
|-------------|------------|----------------------|----------|------------------|-----------|
| Source Type | ESI        | Ion Polarity         | Negative | Set Nebulizer    | 0.4 Bar   |
| Focus       | Not active |                      |          | Set Dry Heater   | 180 °C    |
| Scan Begin  | 50 m/z     | Set Capillary        | 3200 V   | Set Dry Gas      | 4.0 l/min |
| Scan End    | 3000 m/z   | Set End Plate Offset | -500 V   | Set Divert Valve | Waste     |

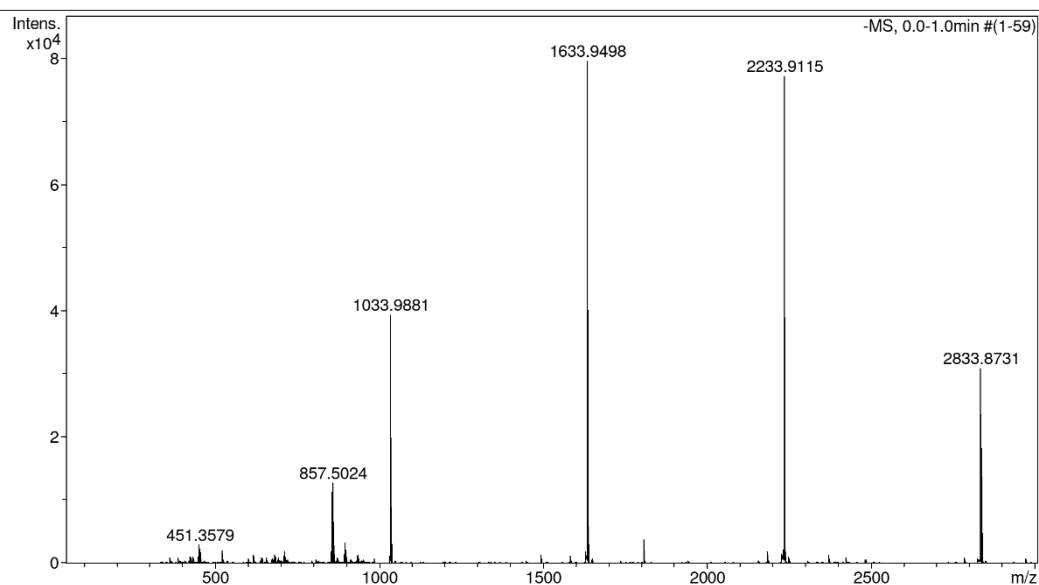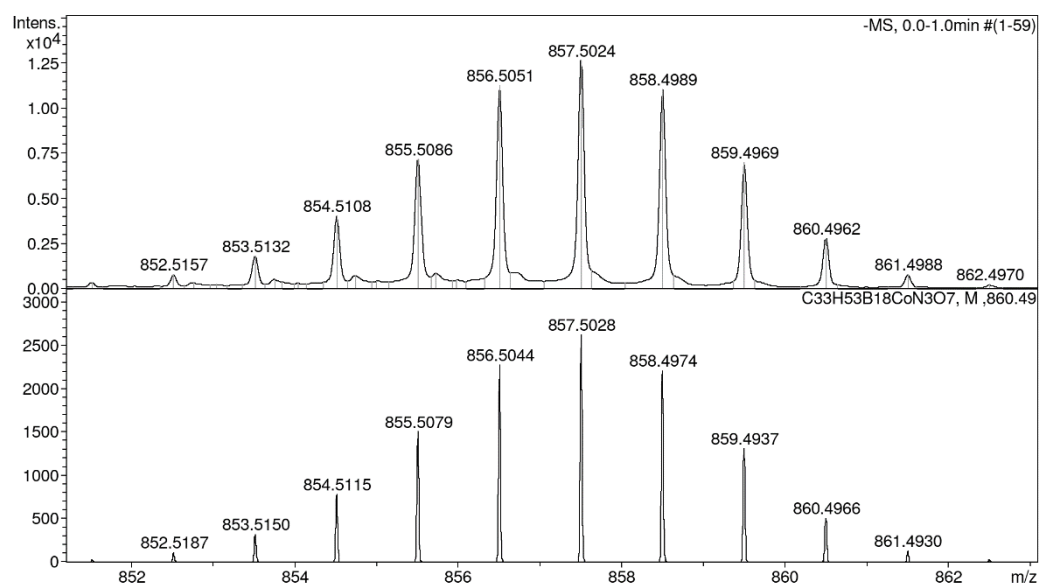

Figure S2. ESI-HRMS spectrum of compound 5

## Display Report

### Analysis Info

Analysis Name C:\AOC2022\Drusina\Jan\_17\da-048\_&clb-.d  
Method tune\_wide\_neg.m  
Sample Name /CHIZ DA-048  
Comment CH3CN 100 %, dil. 20, calibrant added

Acquisition Date 17.01.2022 19:06:37

Operator BDAL@DE  
Instrument / Ser# microTOF 10248

### Acquisition Parameter

|             |            |                      |          |                  |           |
|-------------|------------|----------------------|----------|------------------|-----------|
| Source Type | ESI        | Ion Polarity         | Negative | Set Nebulizer    | 0.4 Bar   |
| Focus       | Not active |                      |          | Set Dry Heater   | 180 °C    |
| Scan Begin  | 50 m/z     | Set Capillary        | 3200 V   | Set Dry Gas      | 4.0 l/min |
| Scan End    | 3000 m/z   | Set End Plate Offset | -500 V   | Set Divert Valve | Waste     |

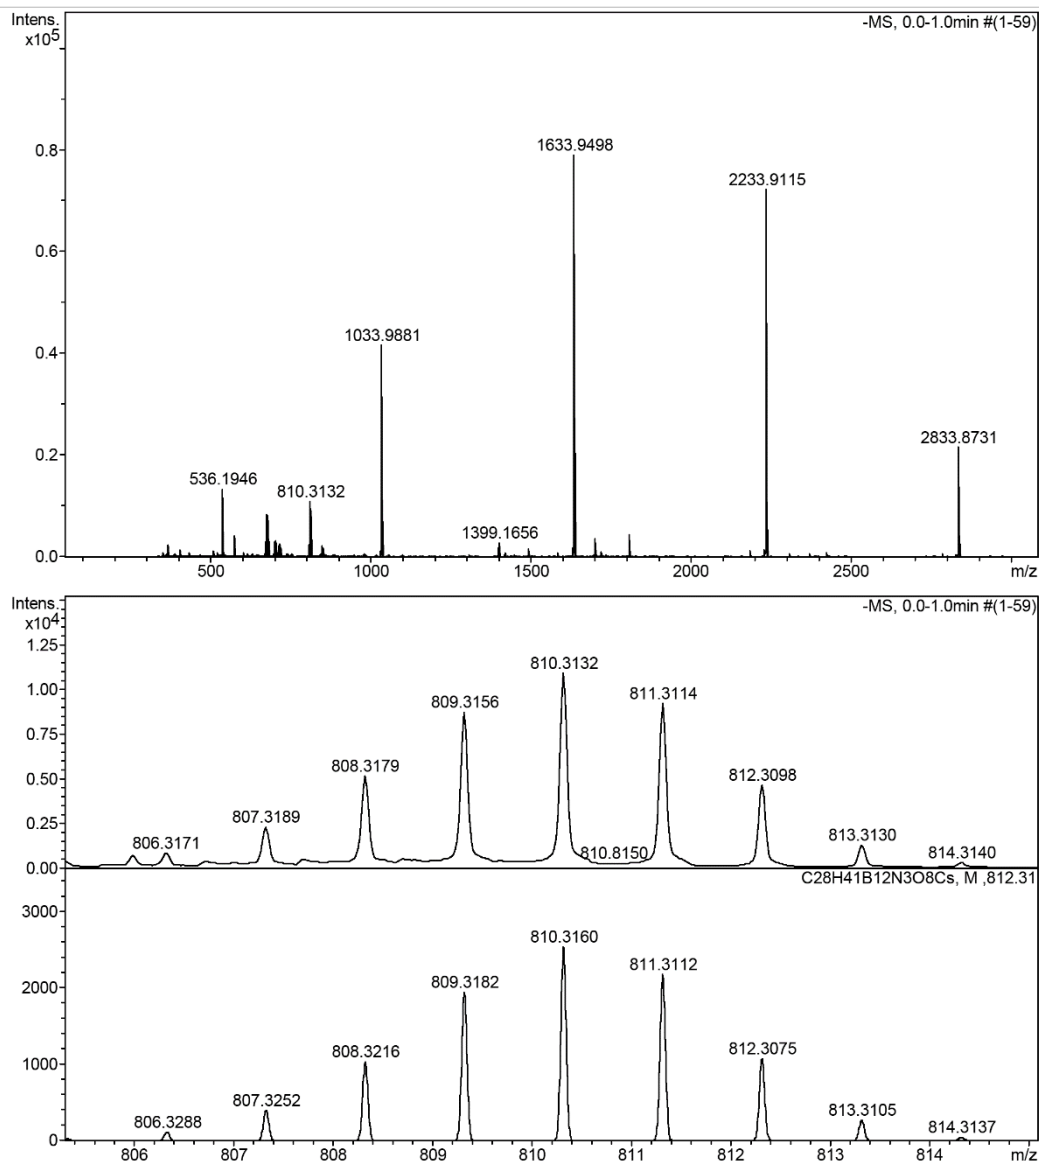

Figure S3. ESI-HRMS spectrum of compound 9

## Display Report

### Analysis Info

Analysis Name C:\AOC2022\Druzina\Jan\_17\da-050\_&clb-.d  
Method tune\_wide\_neg.m  
Sample Name /CHIZ DA-050  
Comment CH3CN 100 %, dil. 20, calibrant added

Acquisition Date 17.01.2022 19:17:16

Operator BDAL@DE  
Instrument / Ser# microTOF 10248

### Acquisition Parameter

|             |            |                      |          |                  |           |
|-------------|------------|----------------------|----------|------------------|-----------|
| Source Type | ESI        | Ion Polarity         | Negative | Set Nebulizer    | 0.4 Bar   |
| Focus       | Not active |                      |          | Set Dry Heater   | 180 °C    |
| Scan Begin  | 50 m/z     | Set Capillary        | 3200 V   | Set Dry Gas      | 4.0 l/min |
| Scan End    | 3000 m/z   | Set End Plate Offset | -500 V   | Set Divert Valve | Waste     |

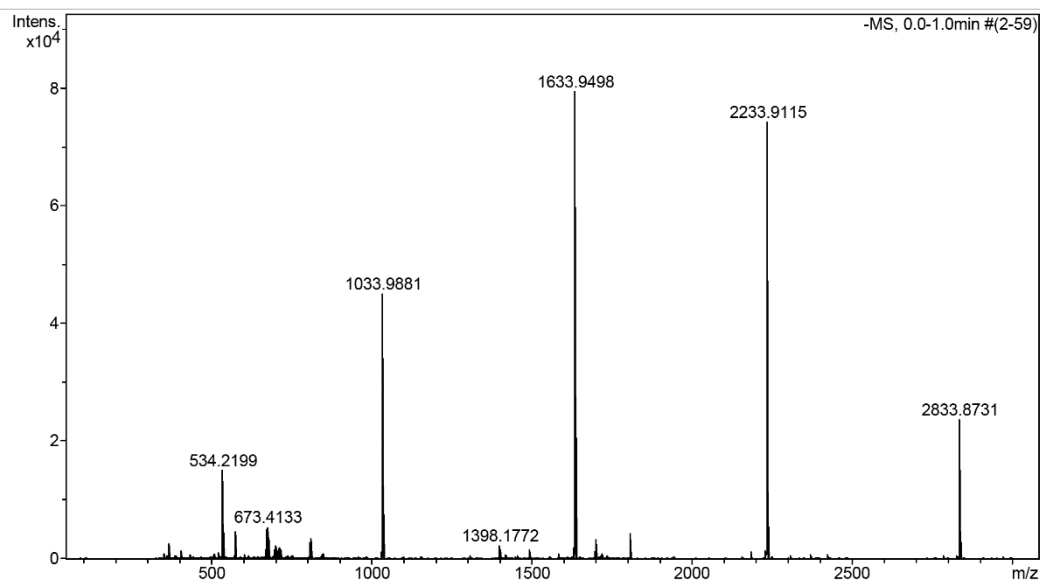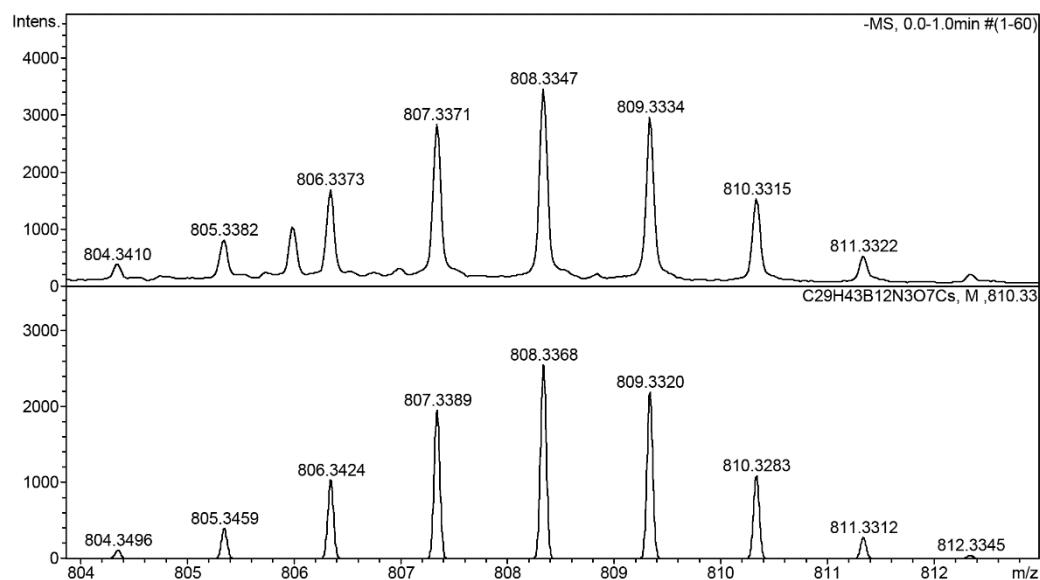

Figure S4. ESI-HRMS spectrum of compound 10

## Display Report

### Analysis Info

Analysis Name C:\AOC2022\Drusina\Jan\_17\da-049\_&clb-.d  
Method tune\_wide\_neg.m  
Sample Name /CHIZ DA-049  
Comment CH3CN 100 %, dil. 20, calibrant added

Acquisition Date 17.01.2022 19:12:24

Operator BDAL@DE  
Instrument / Ser# microTOF 10248

### Acquisition Parameter

|             |            |                      |          |                  |           |
|-------------|------------|----------------------|----------|------------------|-----------|
| Source Type | ESI        | Ion Polarity         | Negative | Set Nebulizer    | 0.4 Bar   |
| Focus       | Not active |                      |          | Set Dry Heater   | 180 °C    |
| Scan Begin  | 50 m/z     | Set Capillary        | 3200 V   | Set Dry Gas      | 4.0 l/min |
| Scan End    | 3000 m/z   | Set End Plate Offset | -500 V   | Set Divert Valve | Waste     |

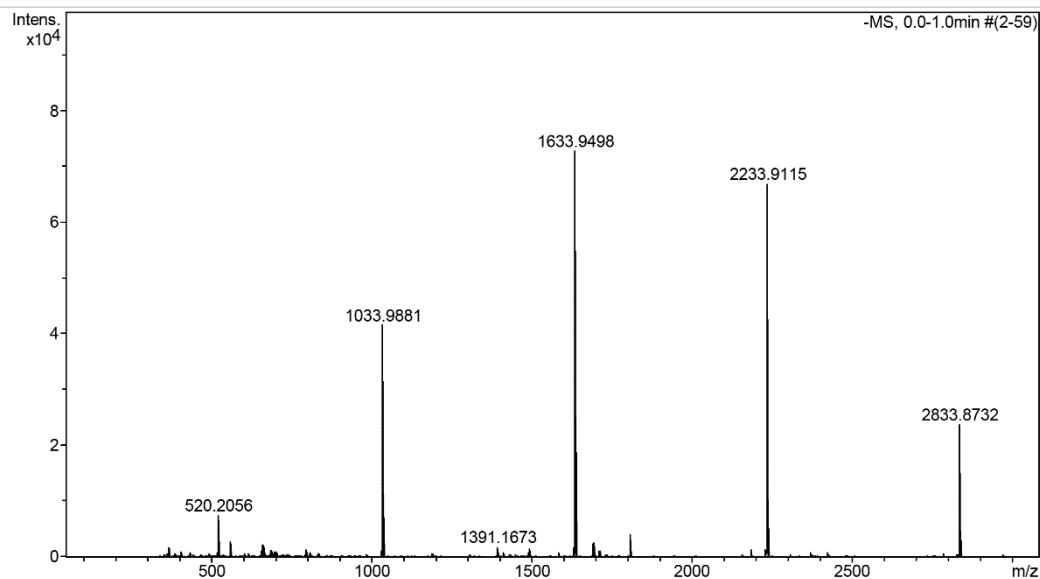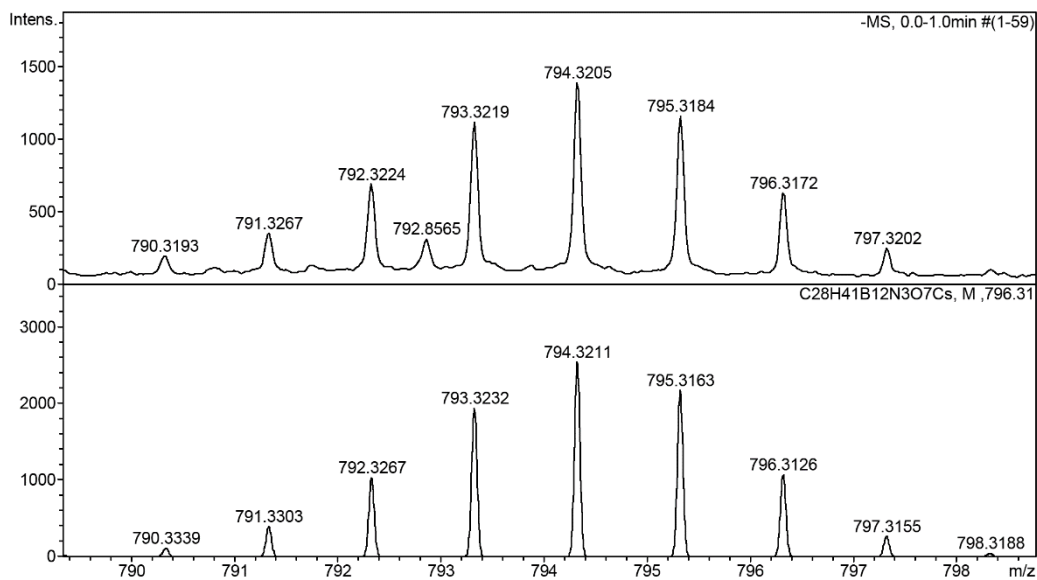

Figure S5. ESI-HRMS spectrum of compound 11

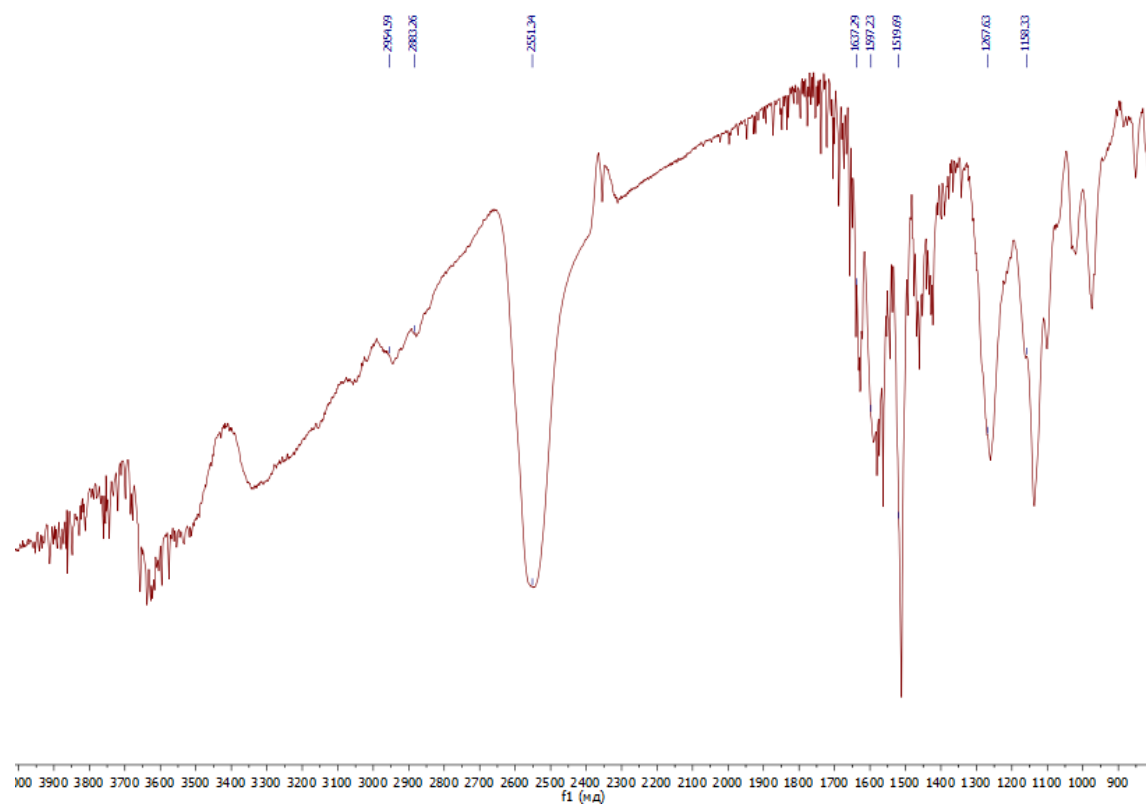

Figure S6. IR spectrum of compound 4

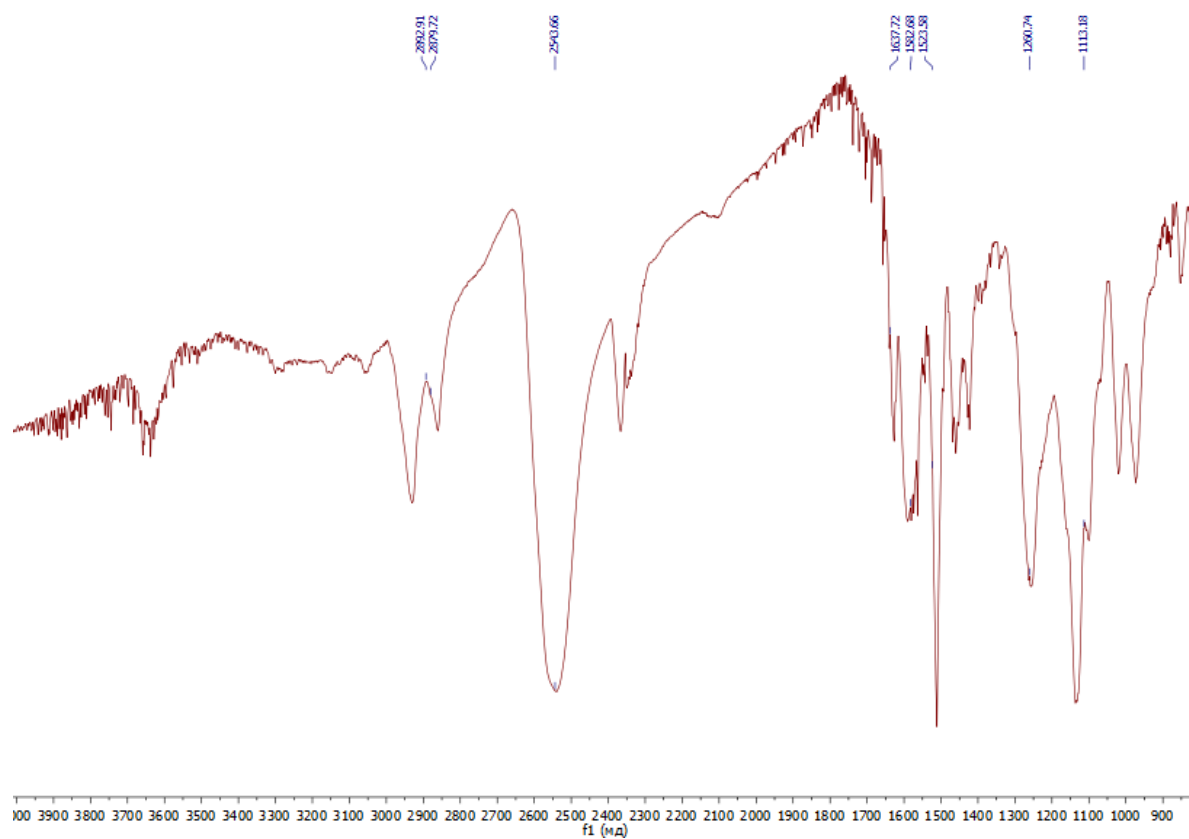

Figure S7. IR spectrum of compound 5

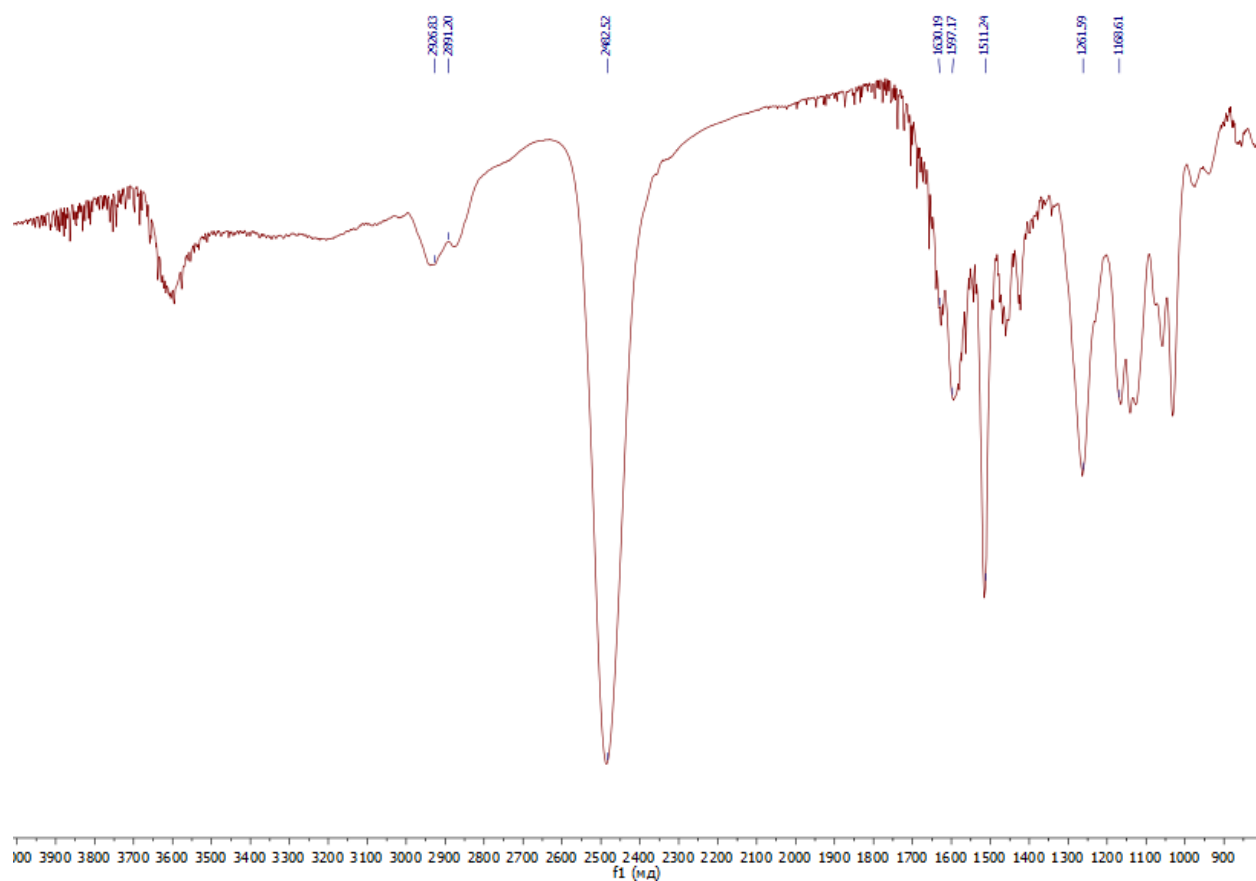

Figure S8. IR spectrum of compound 9

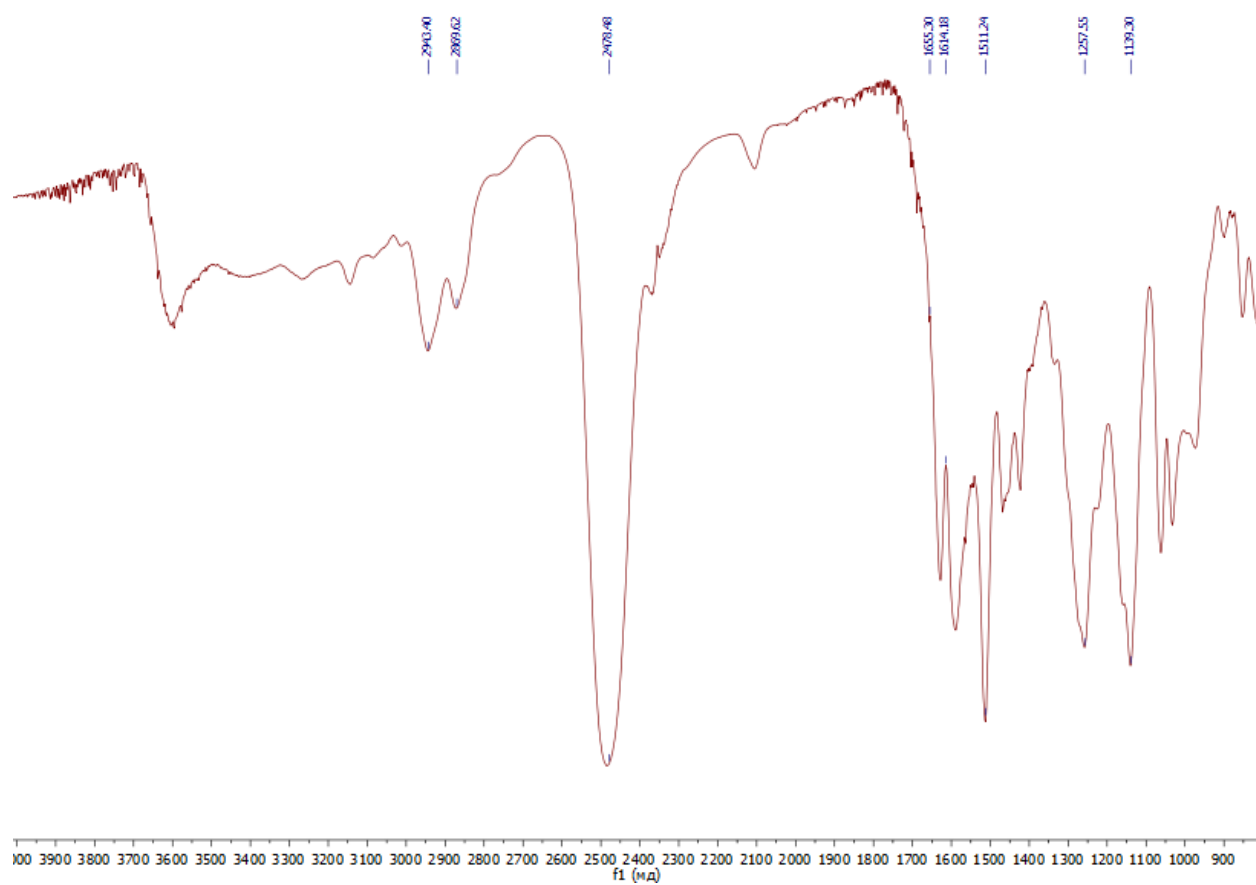

Figure S9. IR spectrum of compound 10



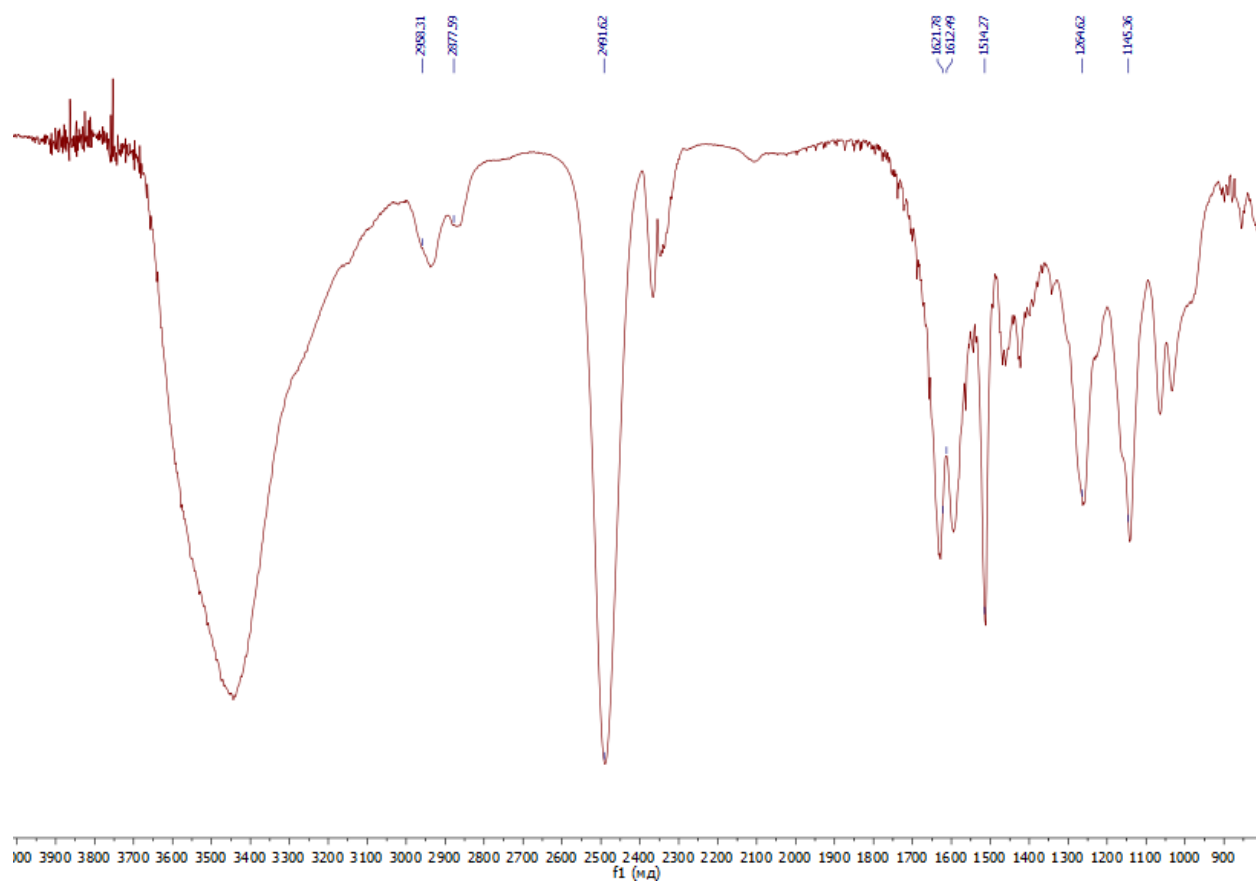

**Figure S10.** IR spectrum of compound 11

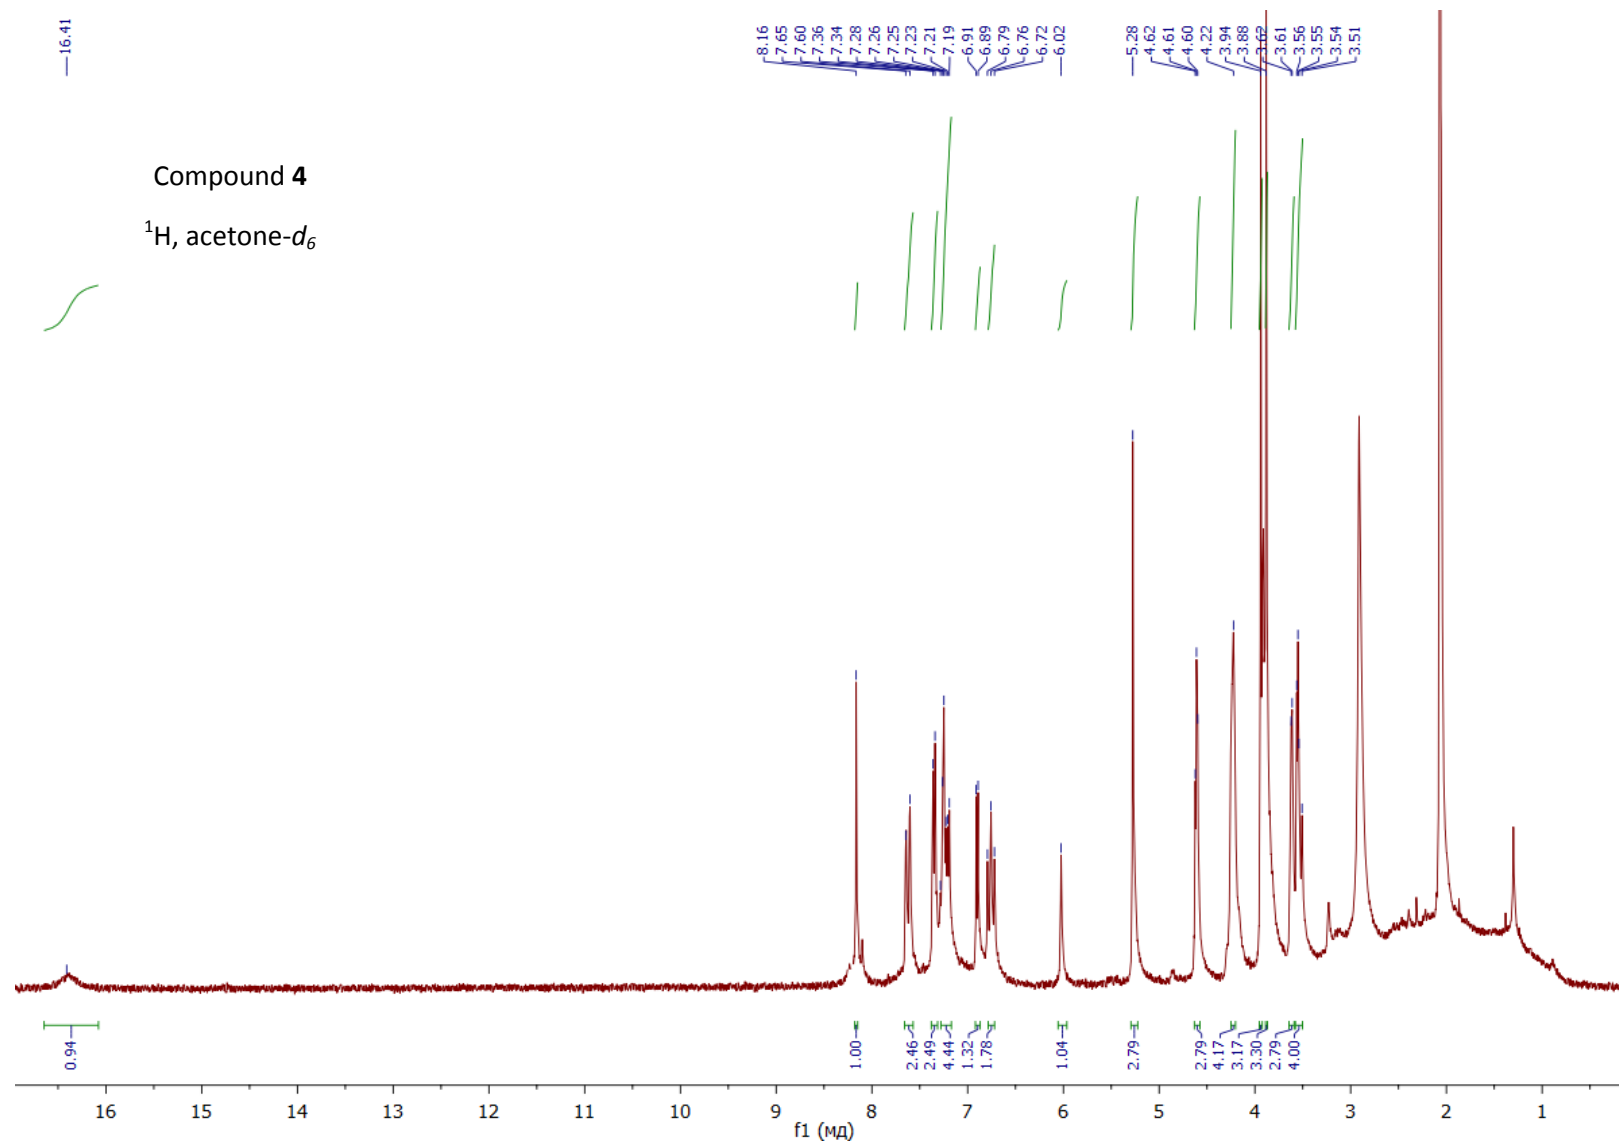

Figure S11.  $^1\text{H}$  NMR spectrum of compound 4

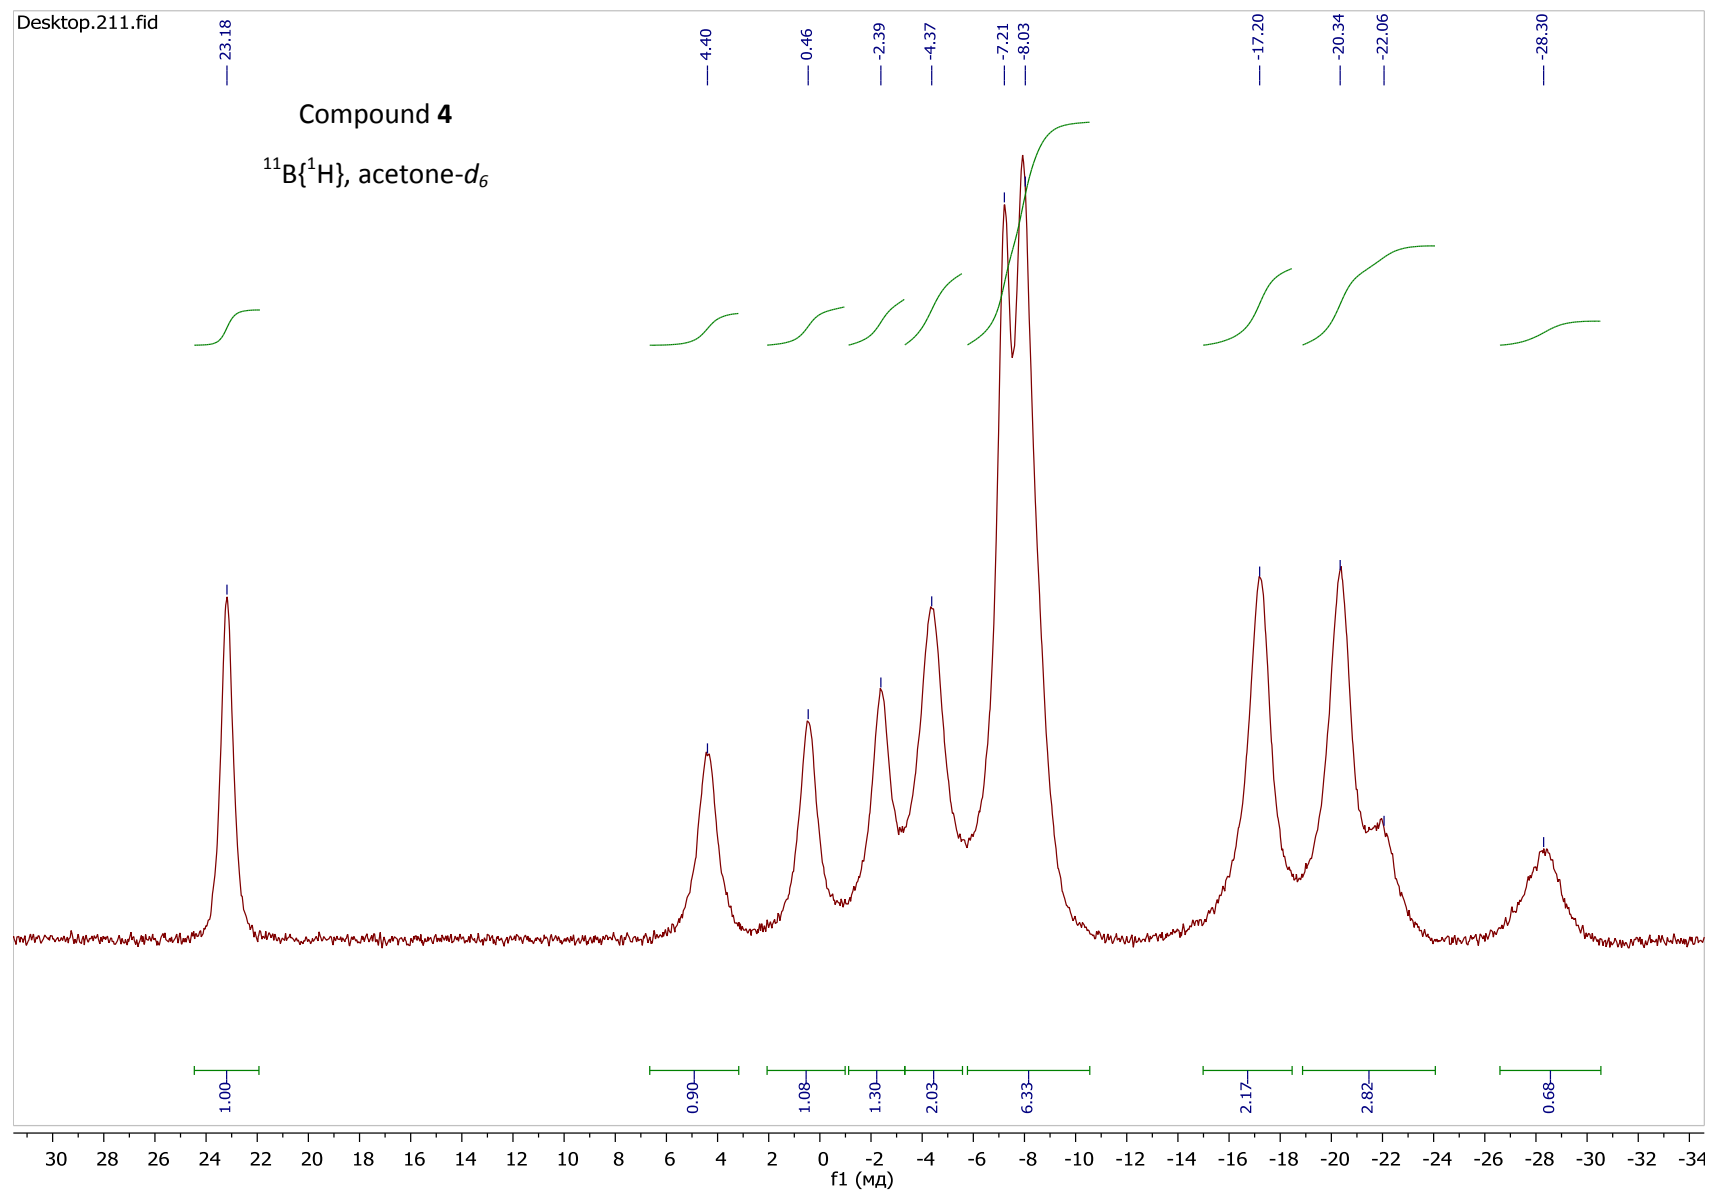

Figure S12.  $^{11}\text{B}\{^1\text{H}\}$  NMR spectrum of compound 4

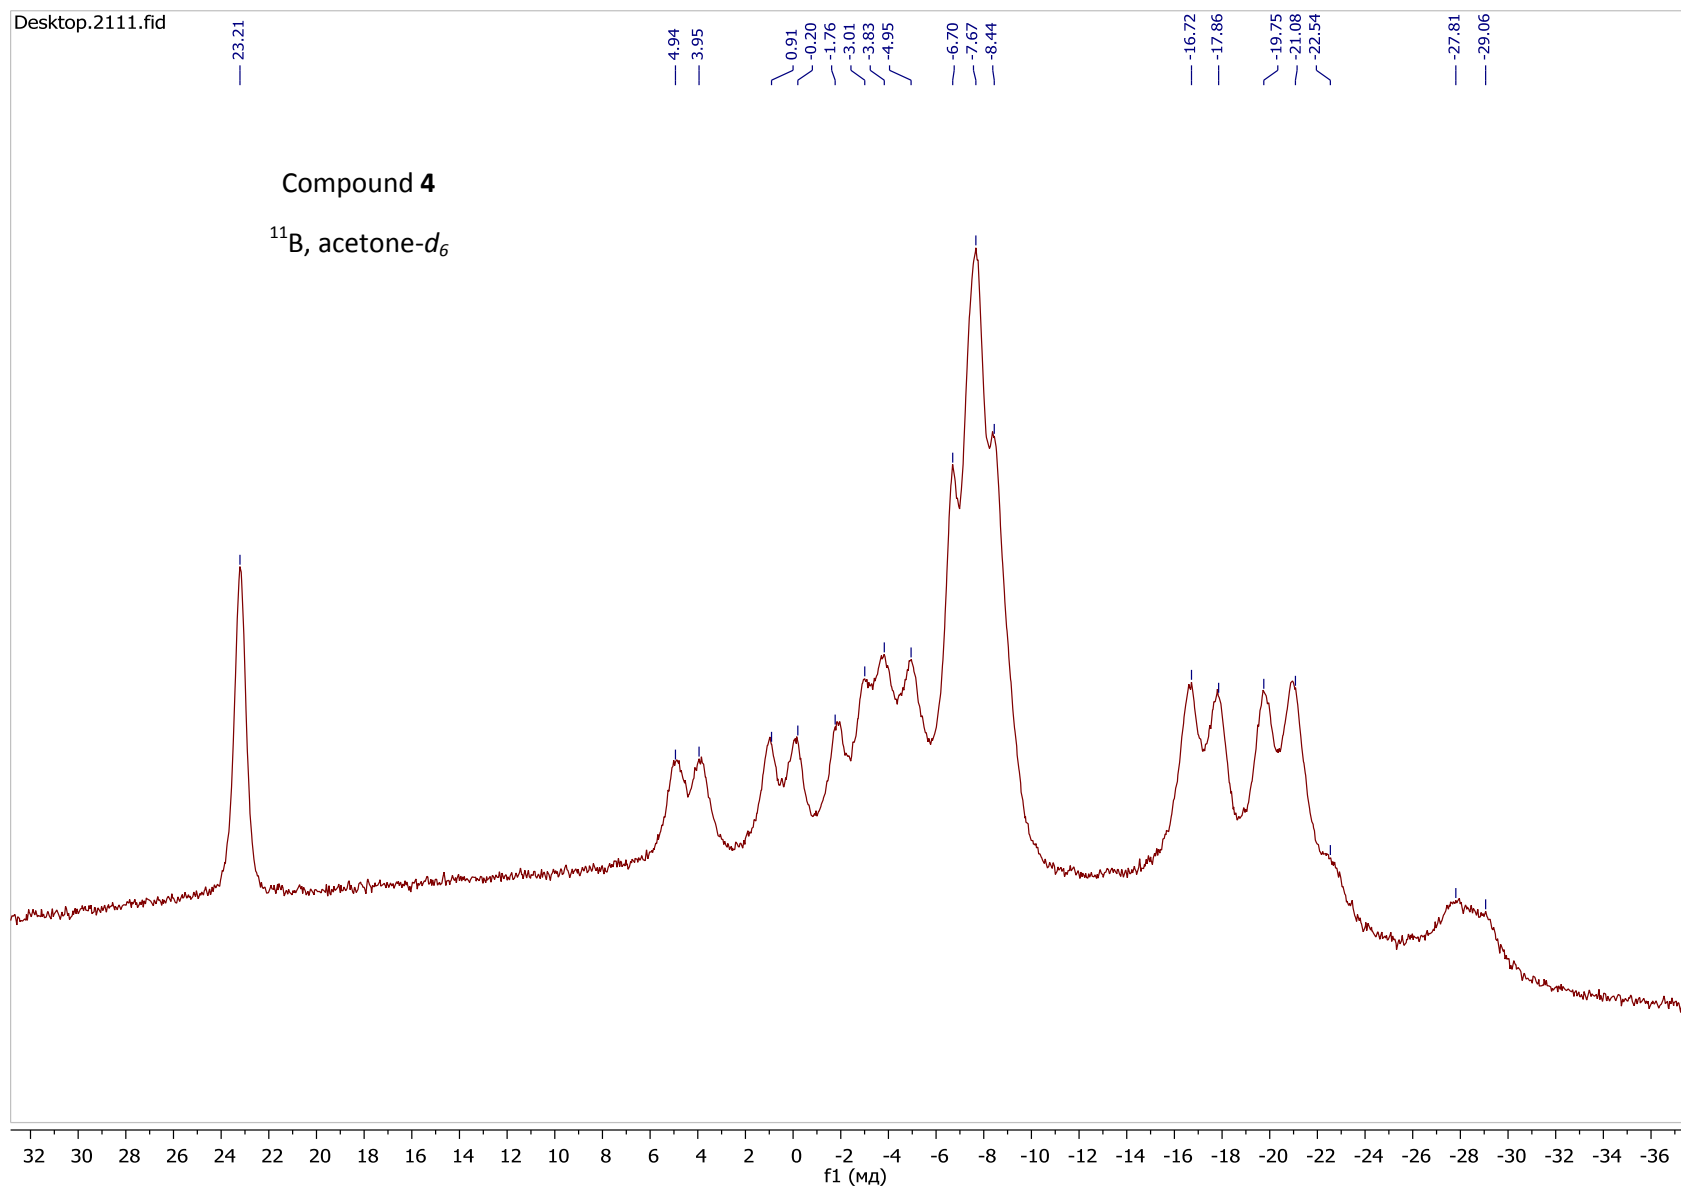

Figure S13.  $^{11}\text{B}$  NMR spectrum of compound **4**

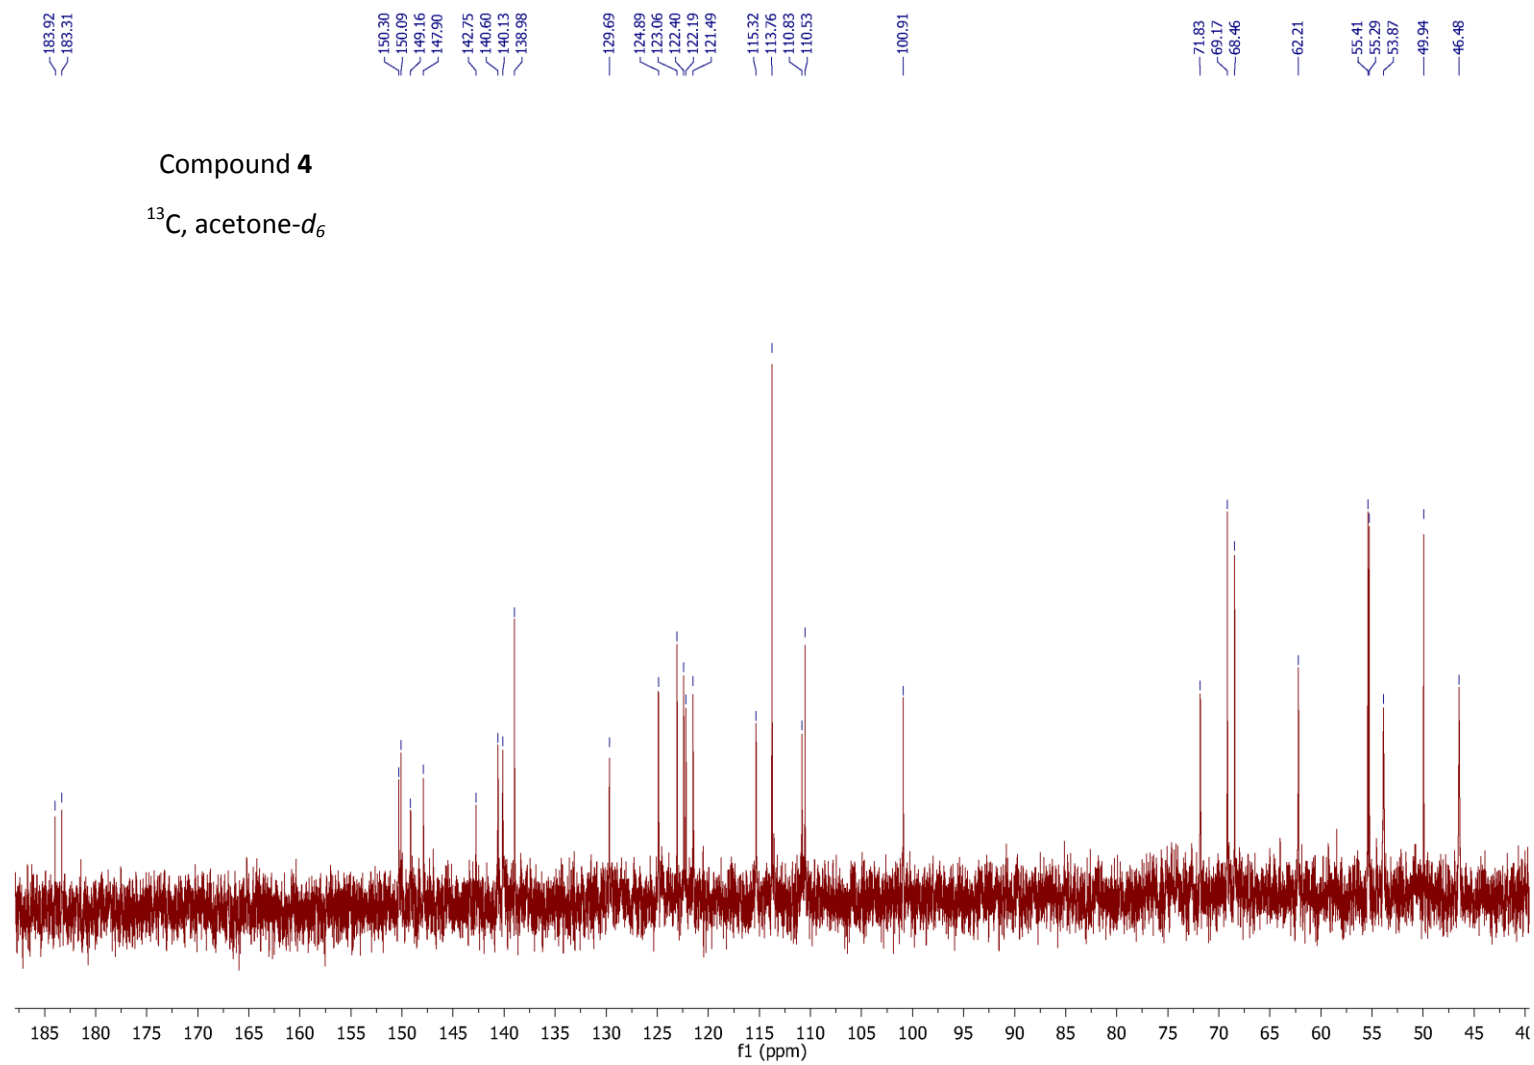

**Figure S14.**  $^{13}\text{C}$  NMR spectrum of compound **4**

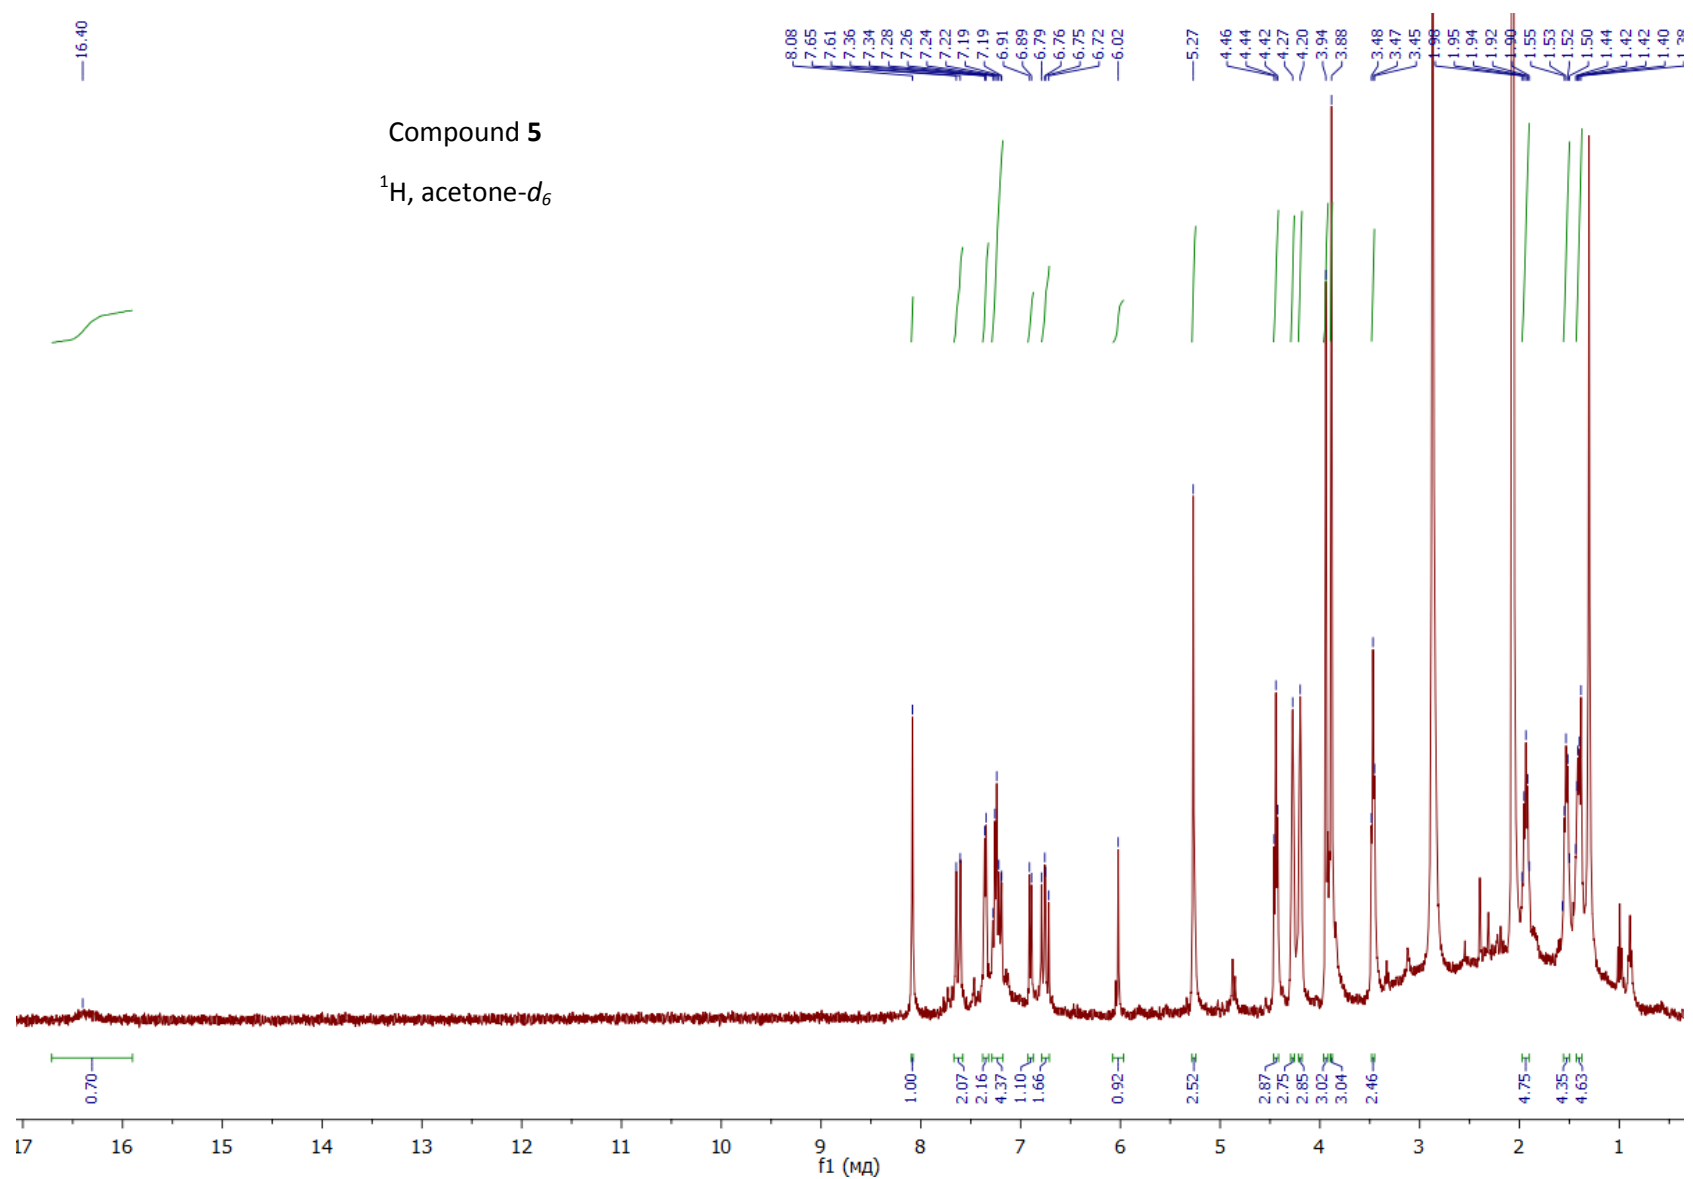

Figure S15.  $^1\text{H}$  NMR spectrum of compound **5**

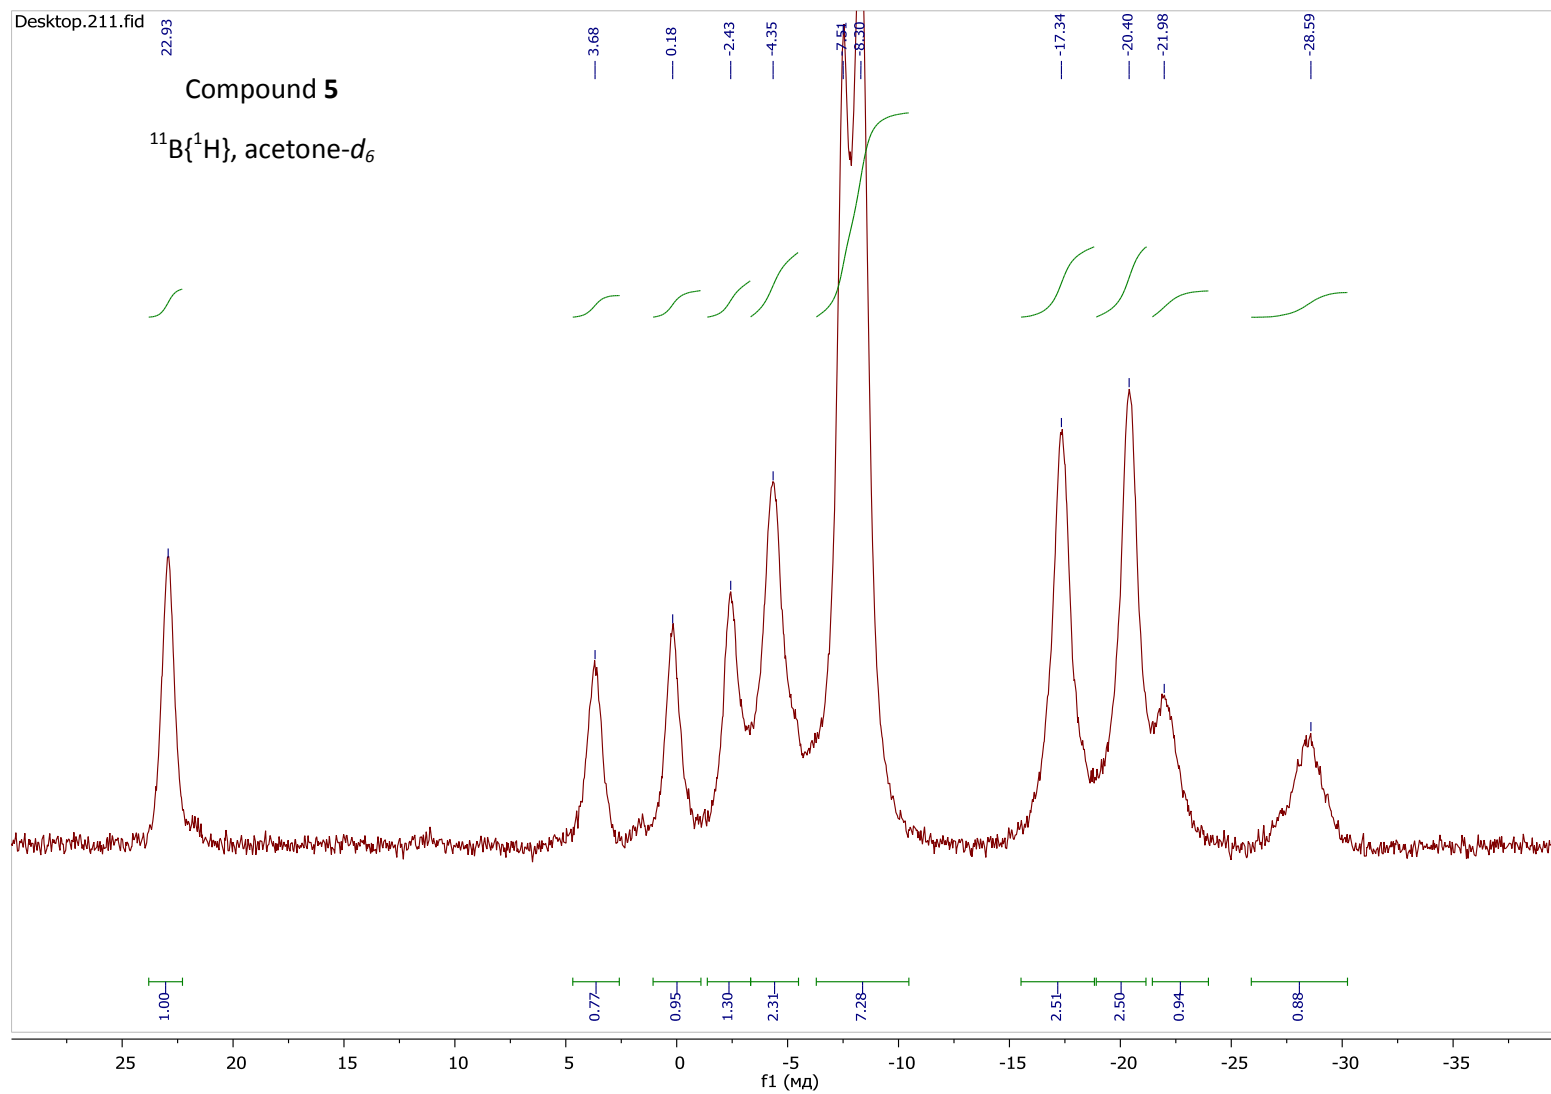

Figure S16.  $^{11}\text{B}\{^1\text{H}\}$  NMR spectrum of compound 5

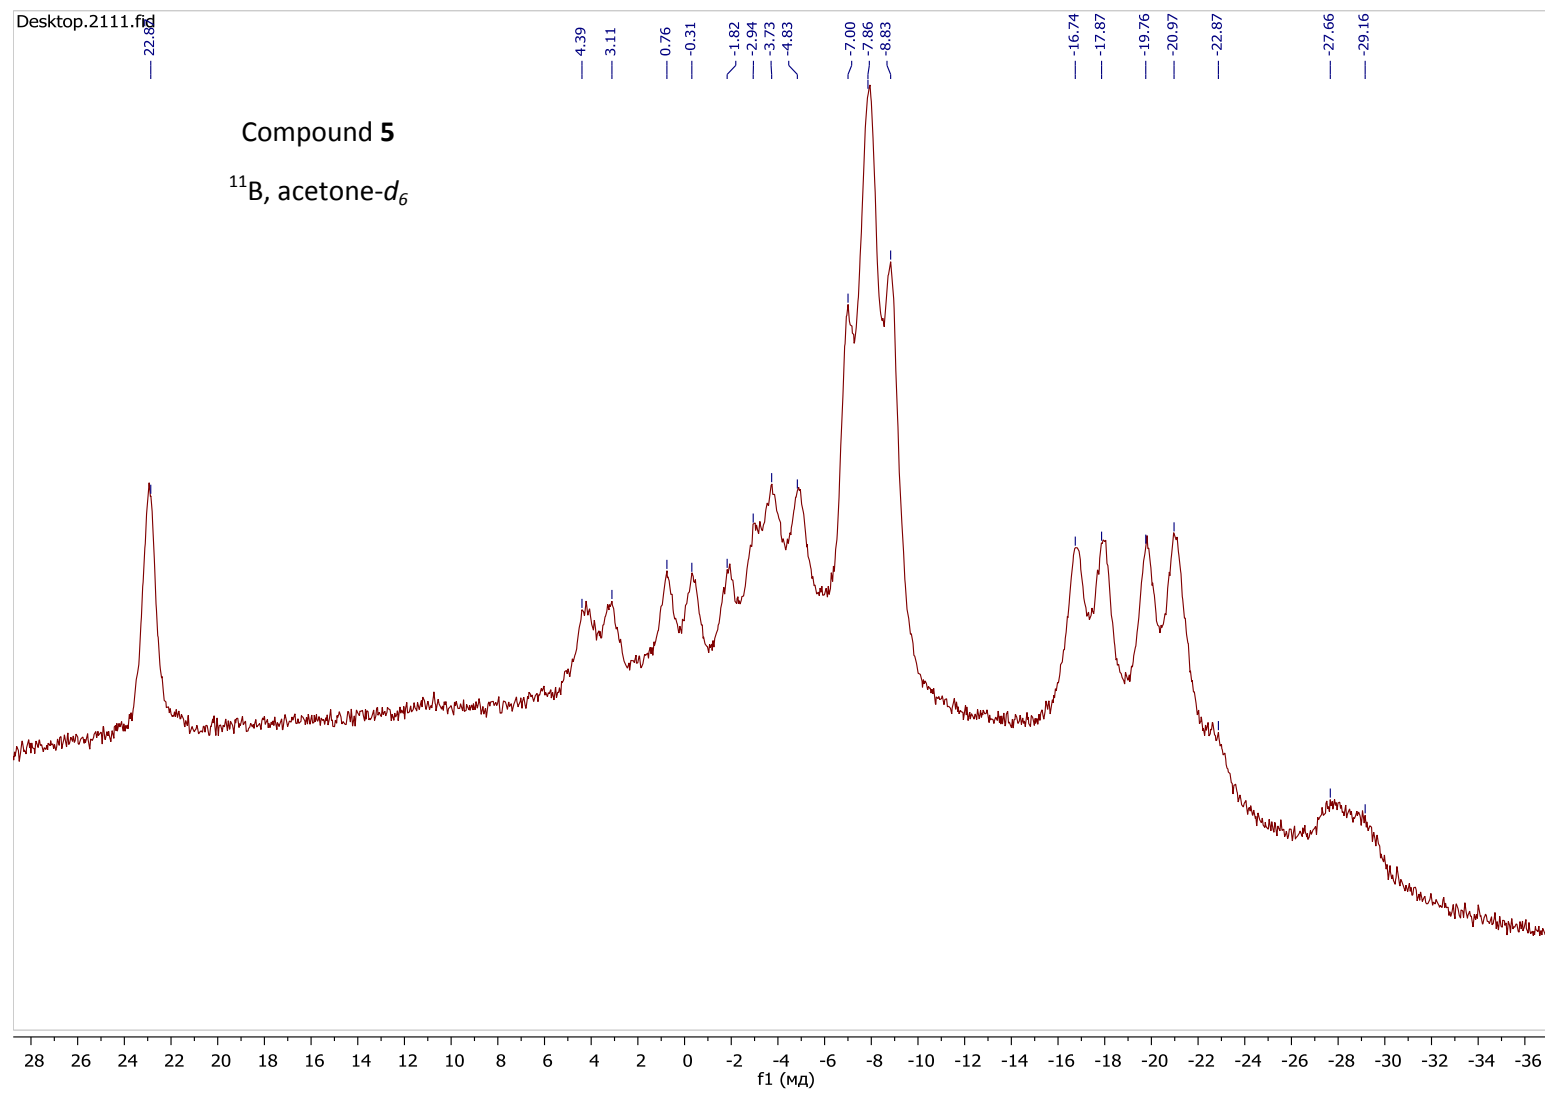

Figure S17.  $^{11}\text{B}$  NMR spectrum of compound 5



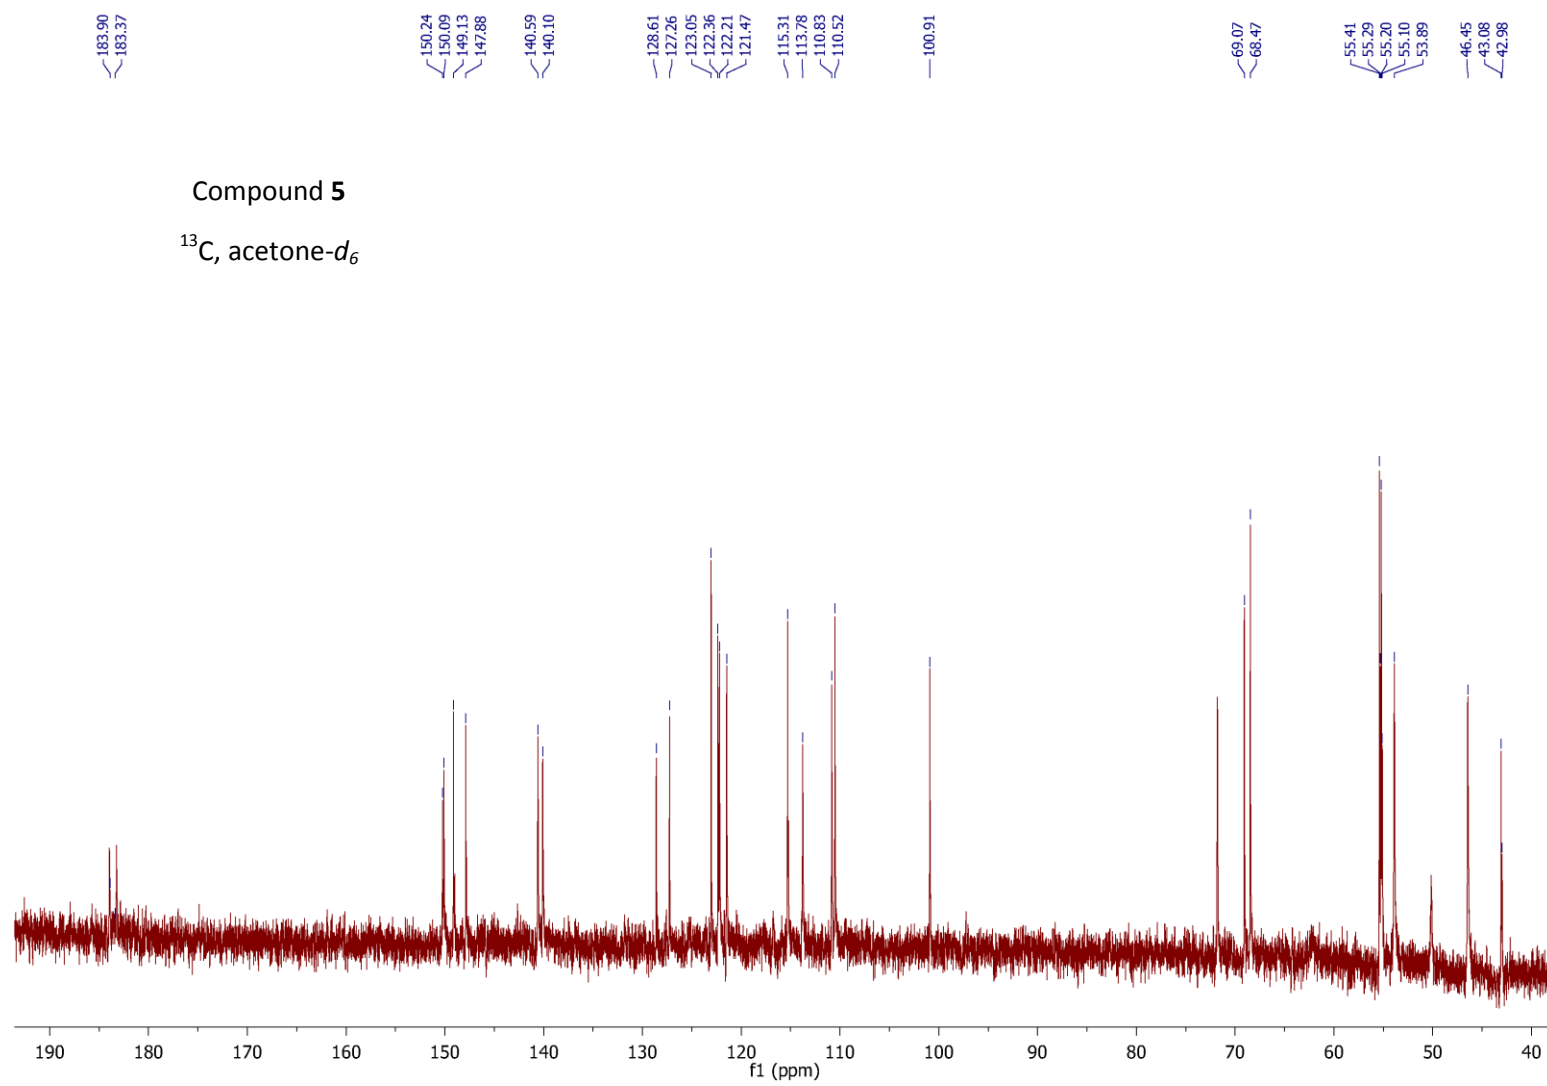

Figure S18.  $^{13}\text{C}$  NMR spectrum of compound 5

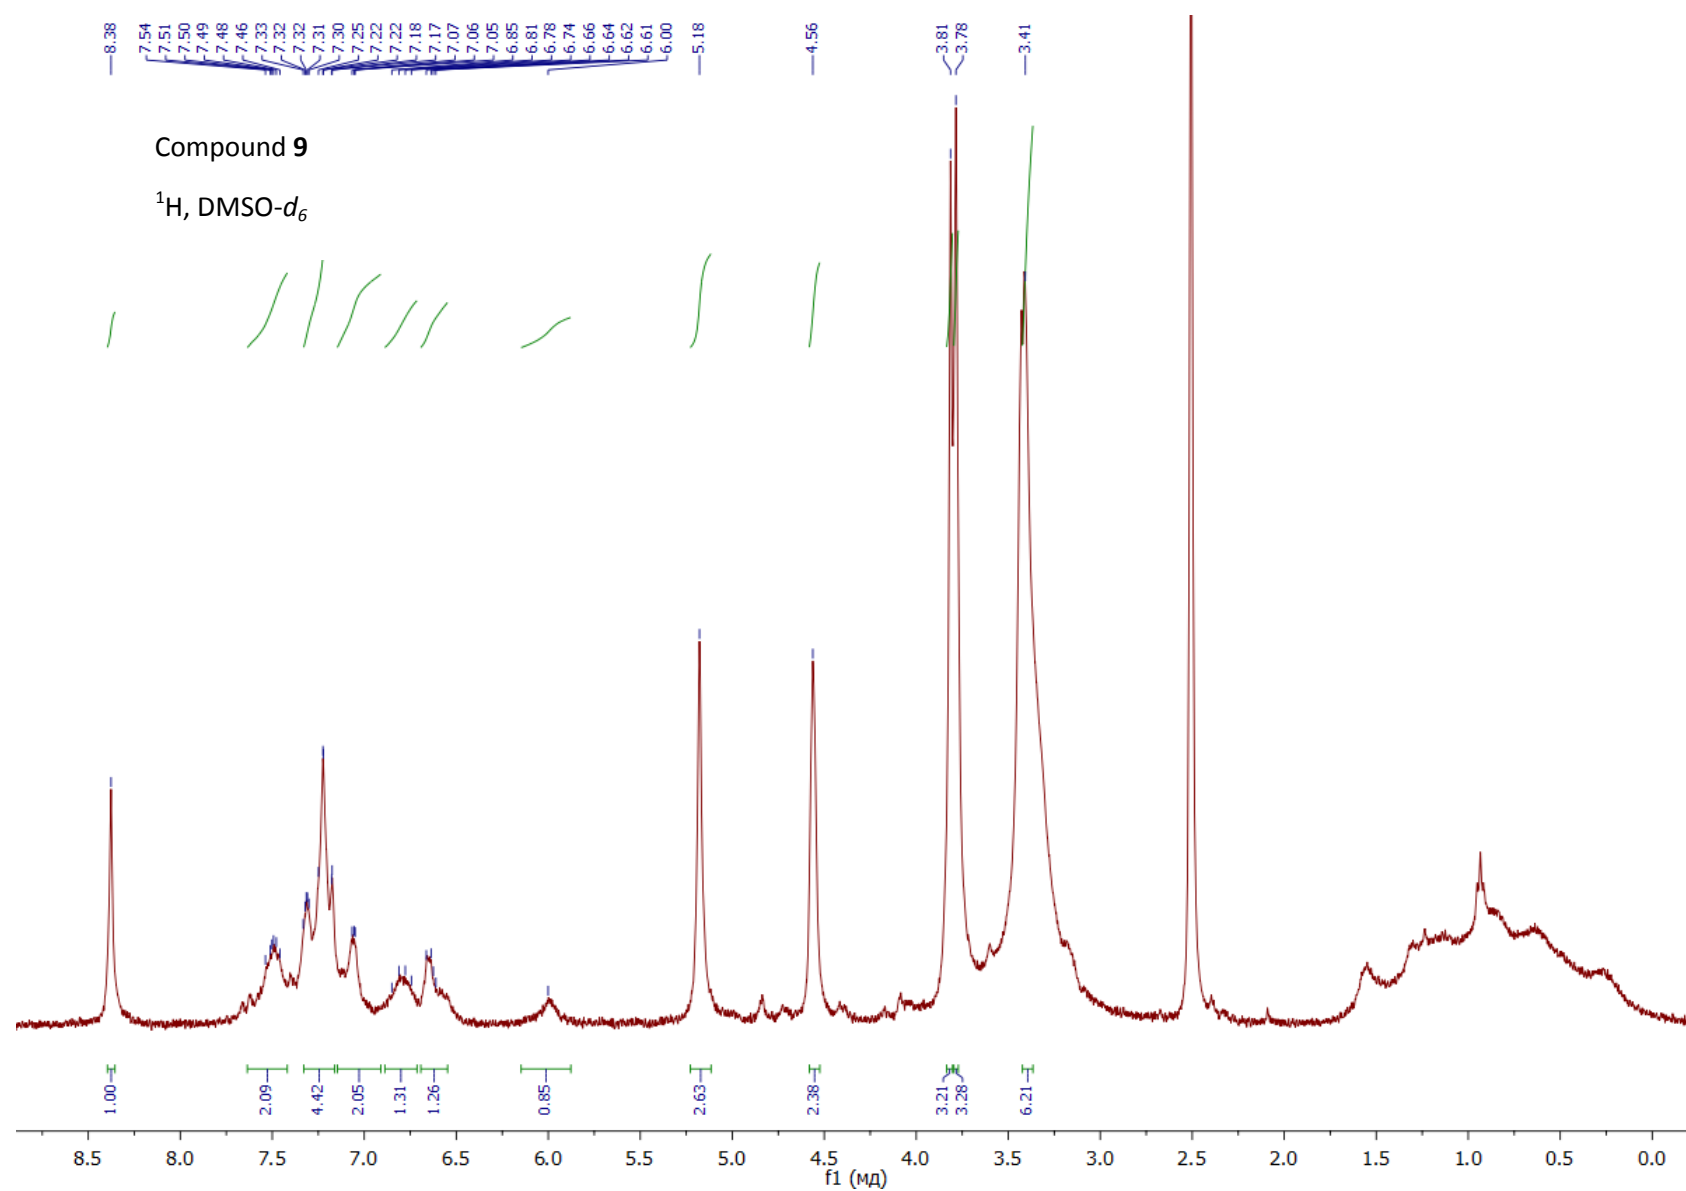

Figure S19.  $^1\text{H}$  NMR spectrum of compound **9**

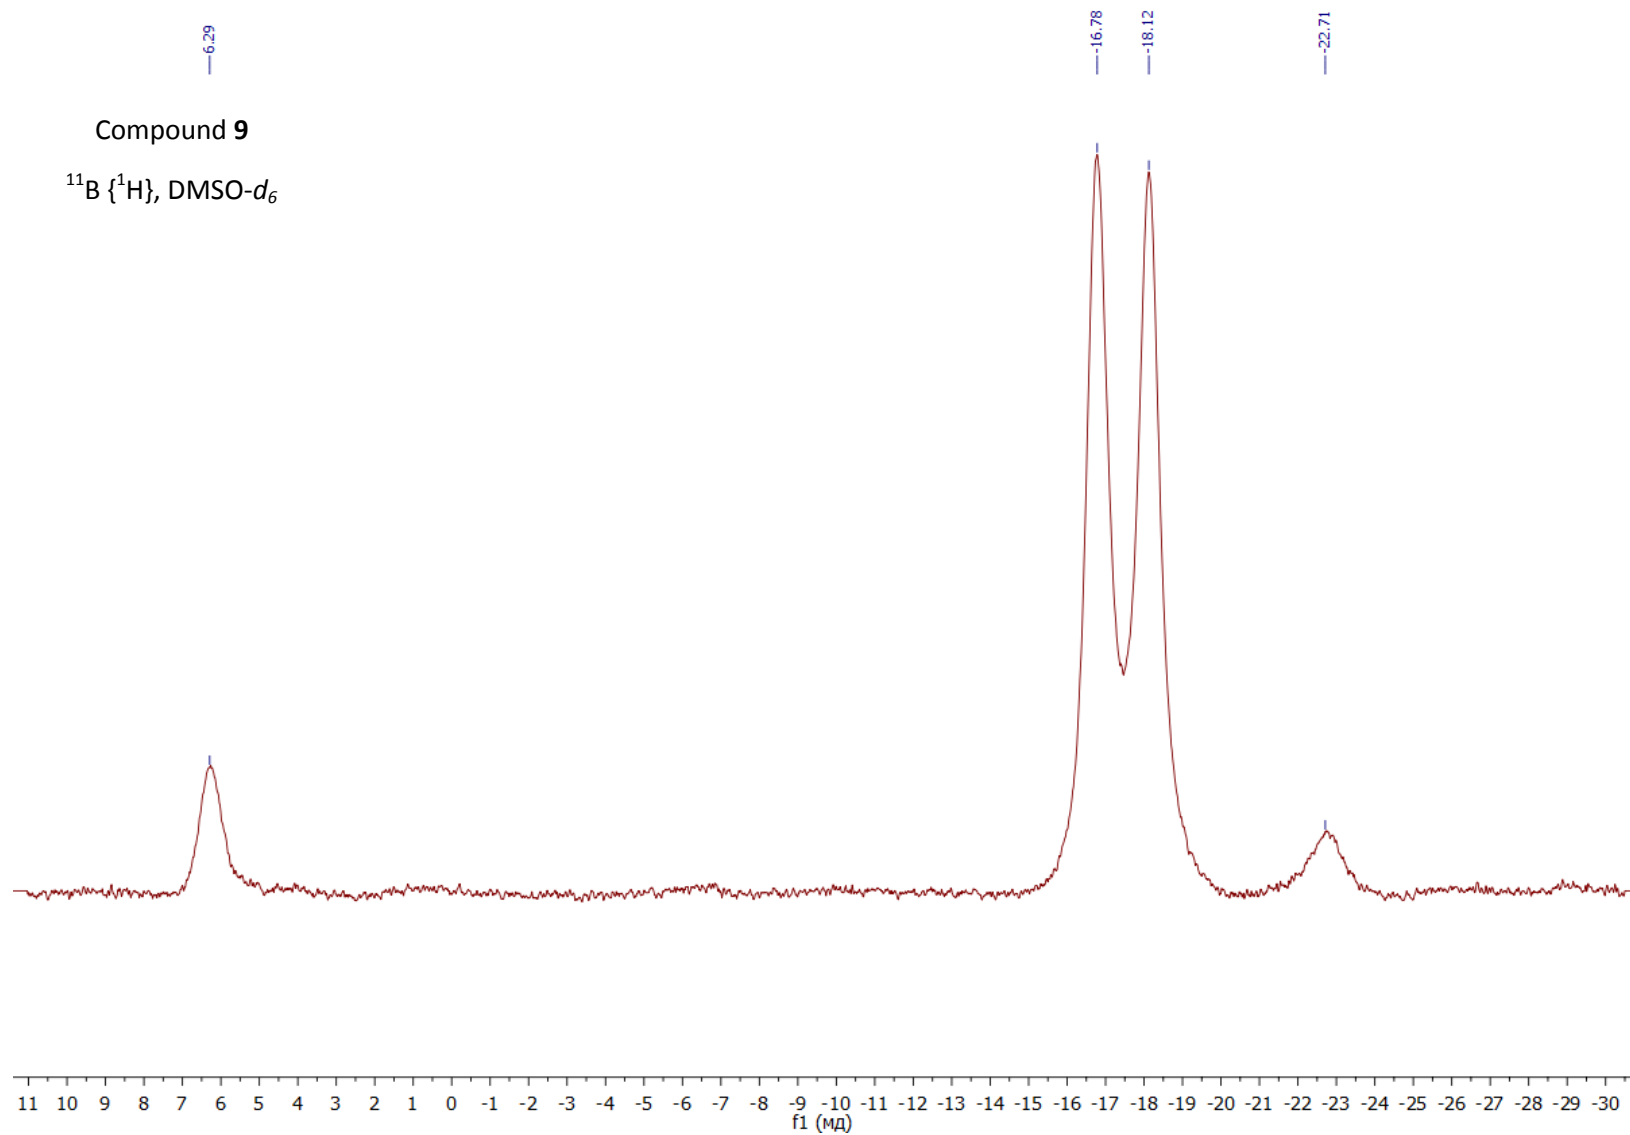

Figure S20.  $^{11}\text{B}\{^1\text{H}\}$  NMR spectrum of compound **9**

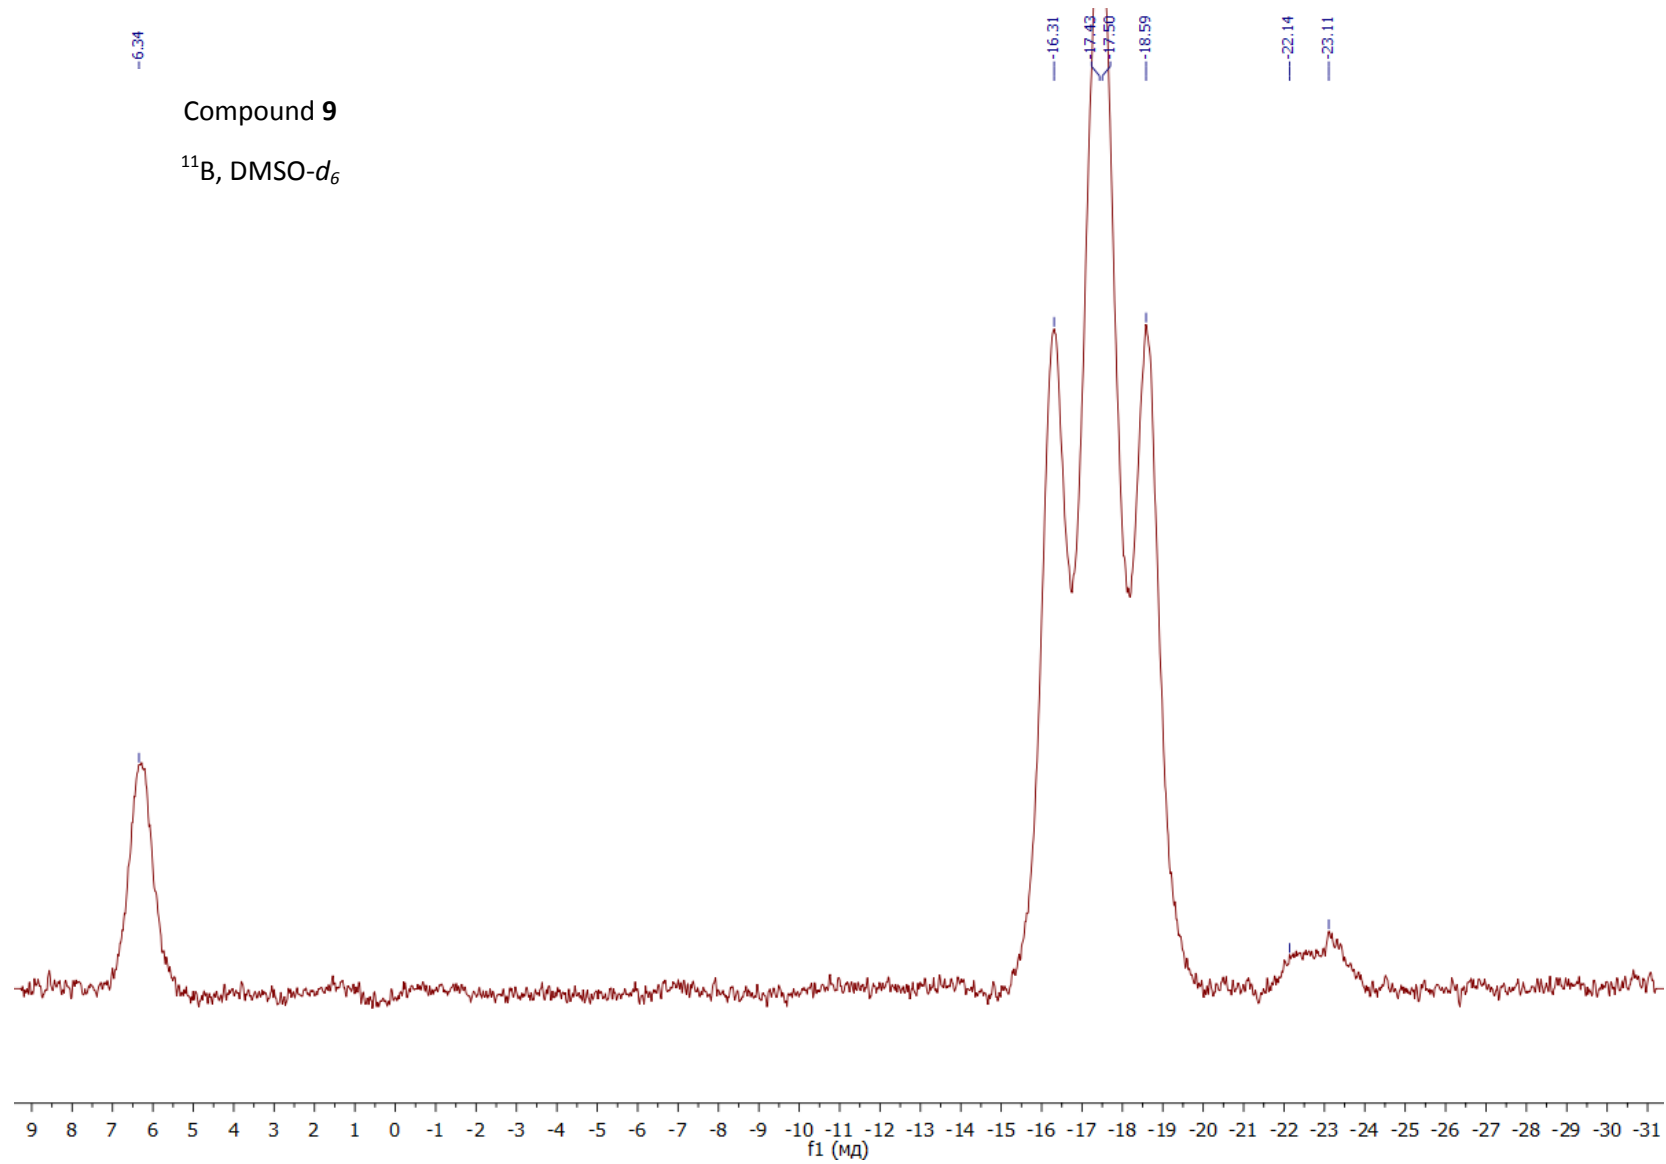

Figure S21.  $^{11}\text{B}$  NMR spectrum of compound **9**

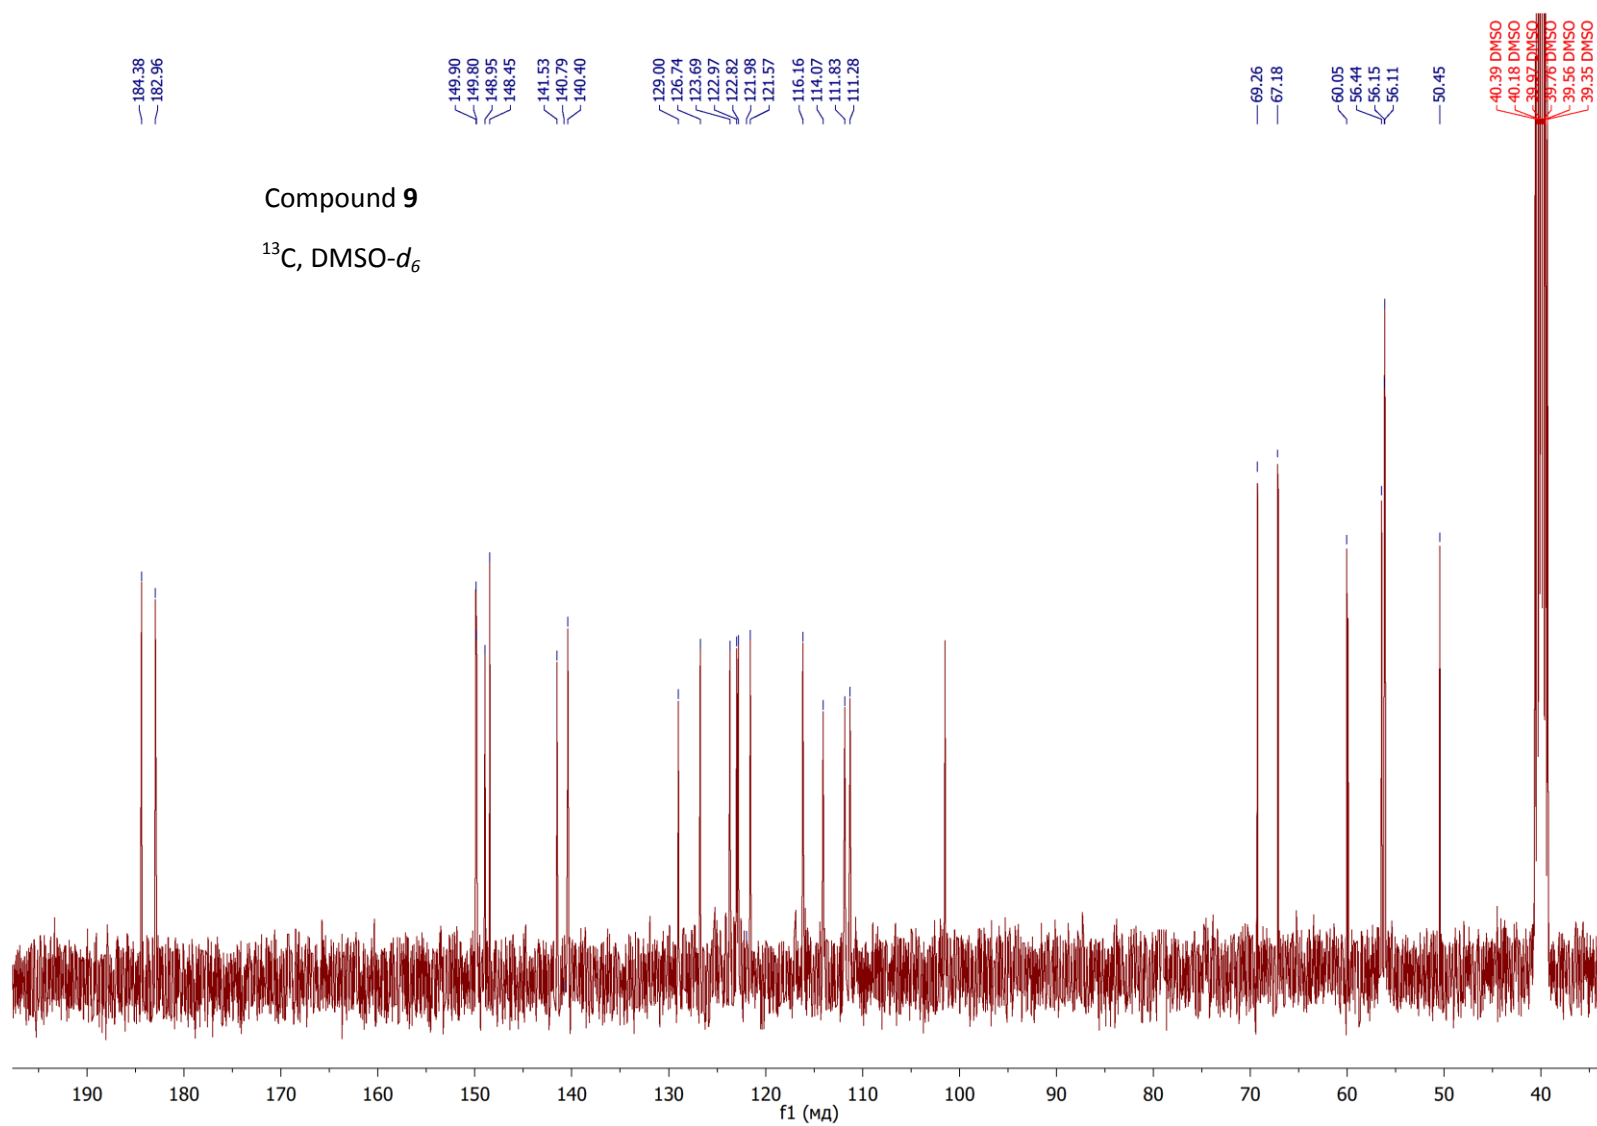

Figure S22.  $^{13}\text{C}$  NMR spectrum of compound **9**

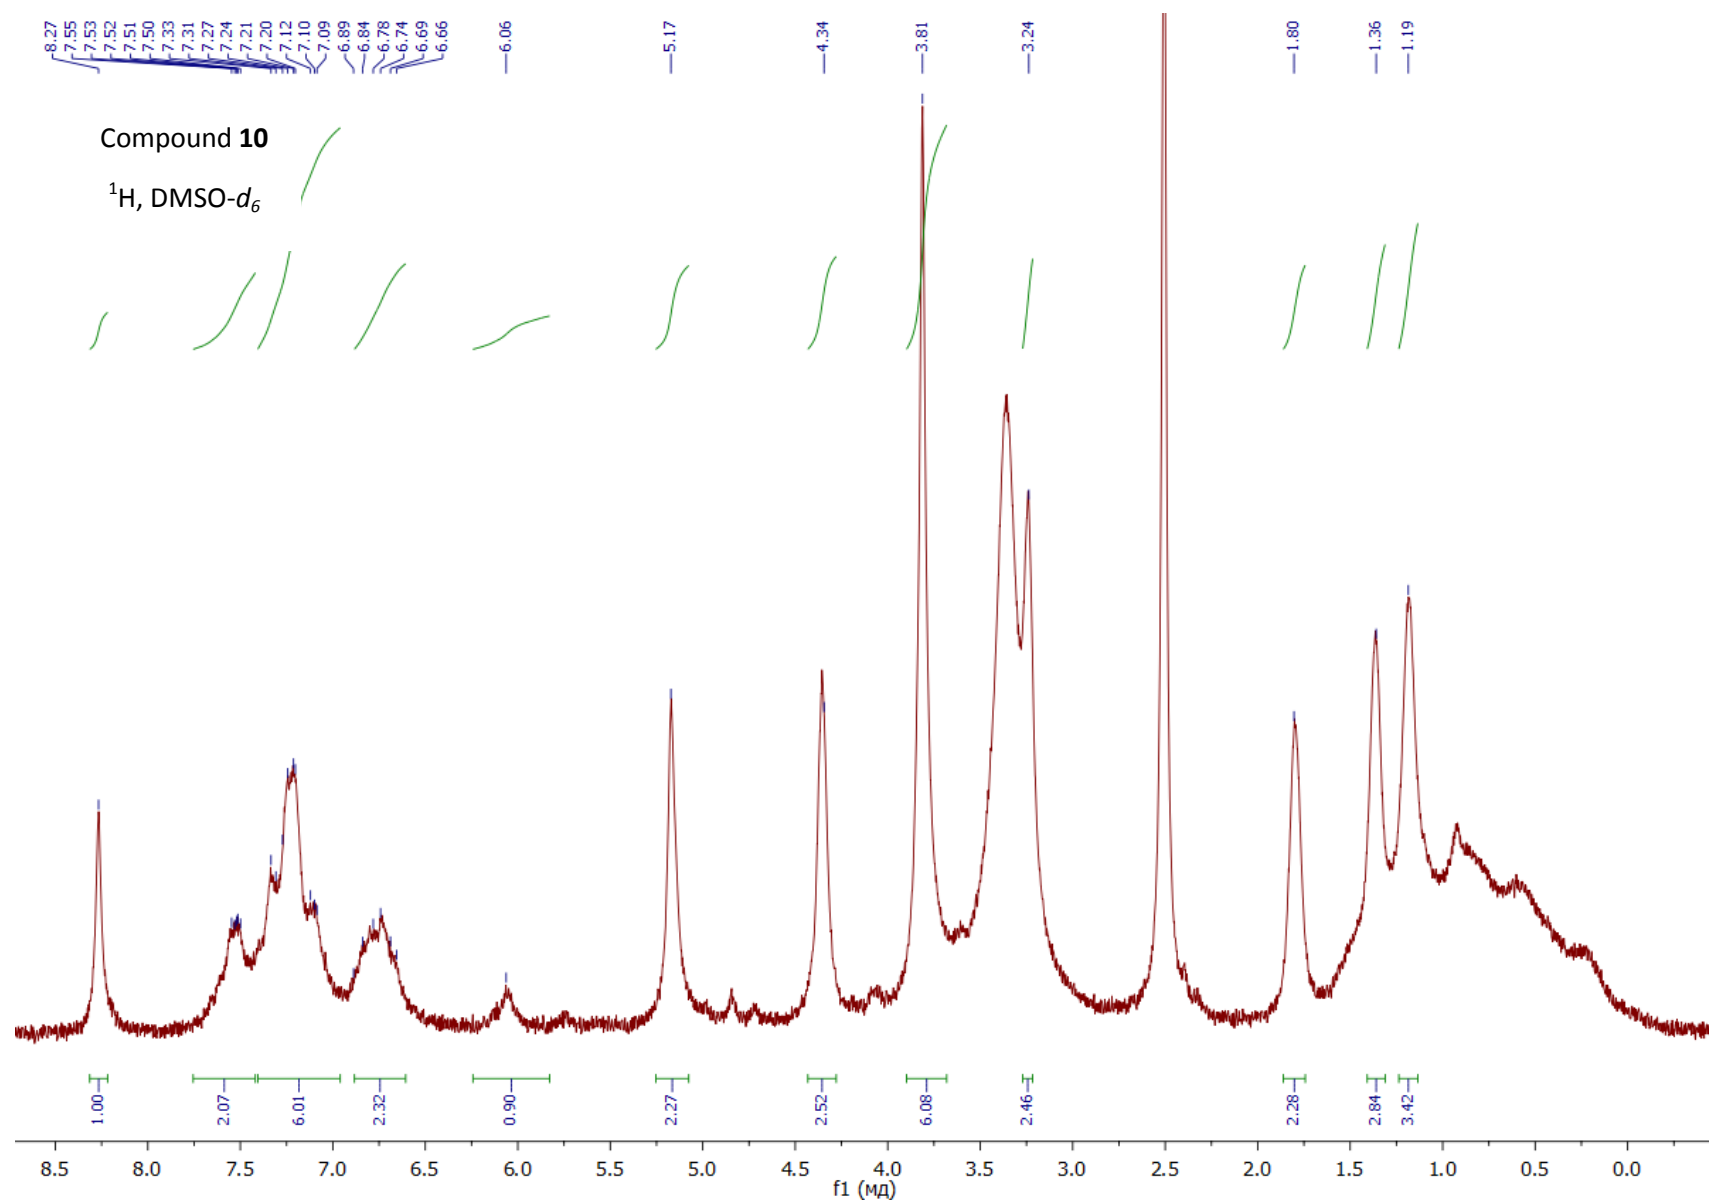

Figure S23.  $^1\text{H}$  NMR spectrum of compound **10**

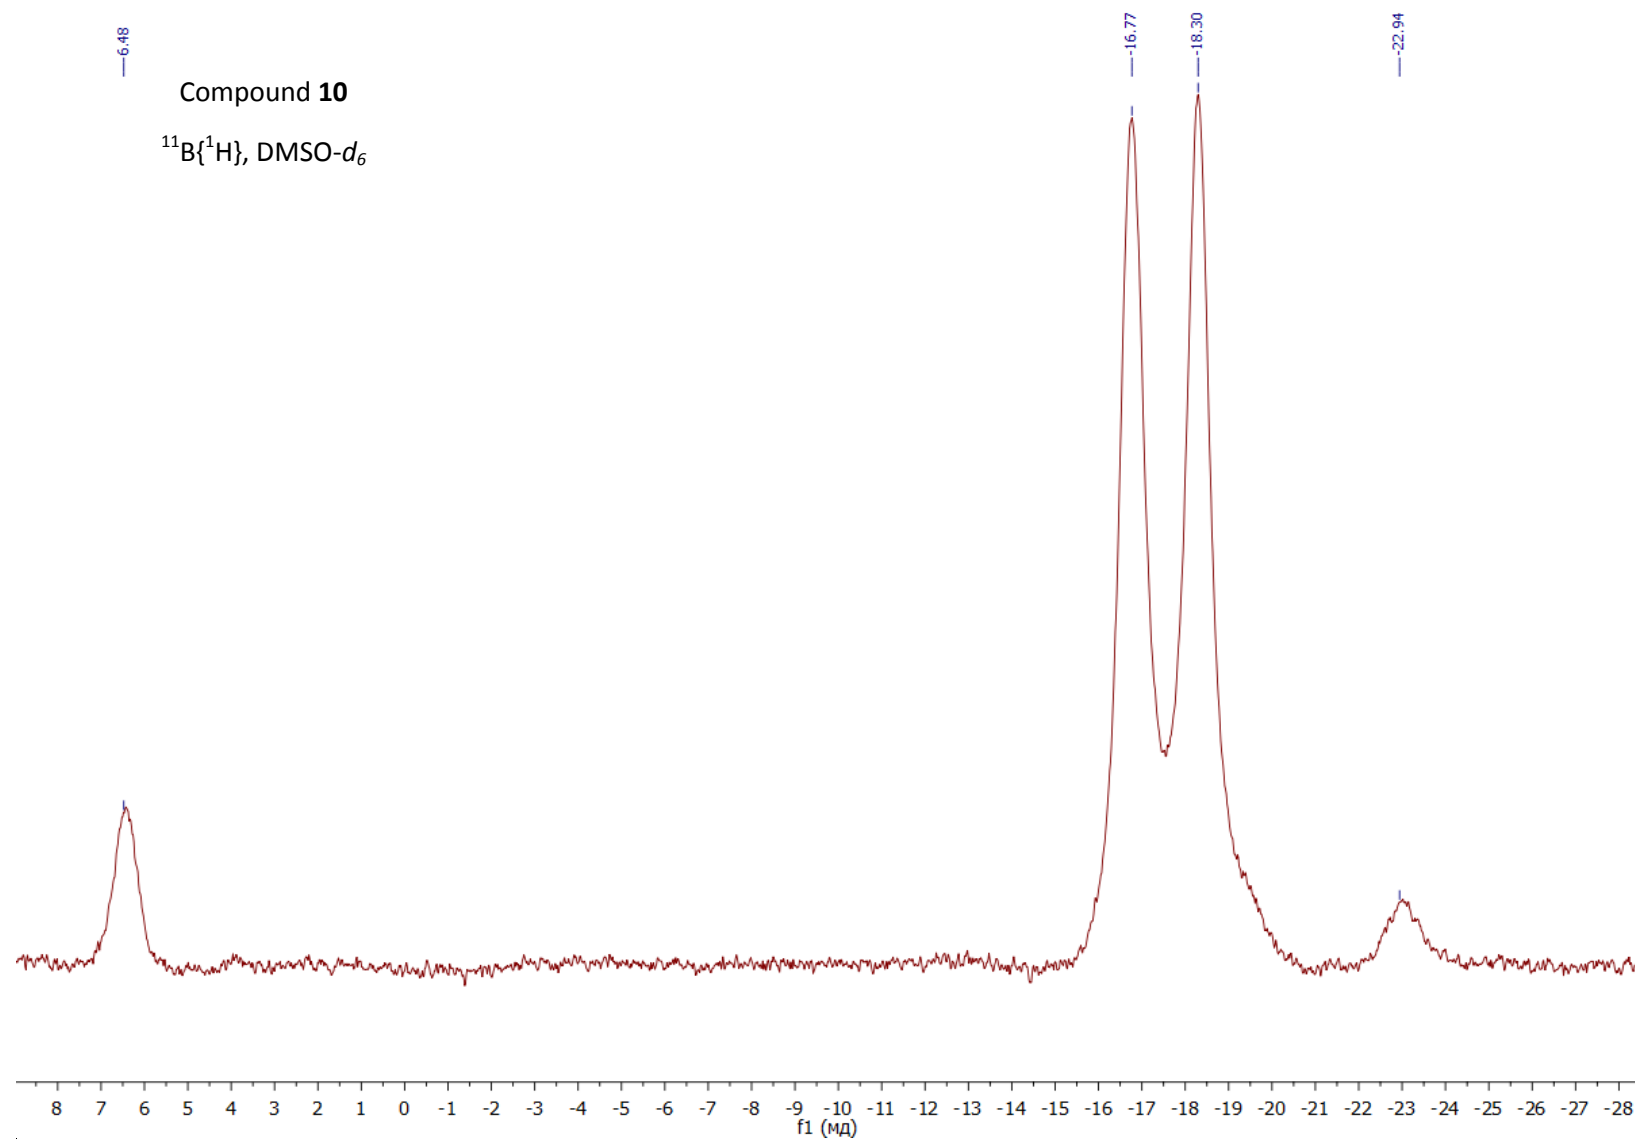

Figure S24.  $^{11}\text{B}\{^1\text{H}\}$  NMR spectrum of compound **10**

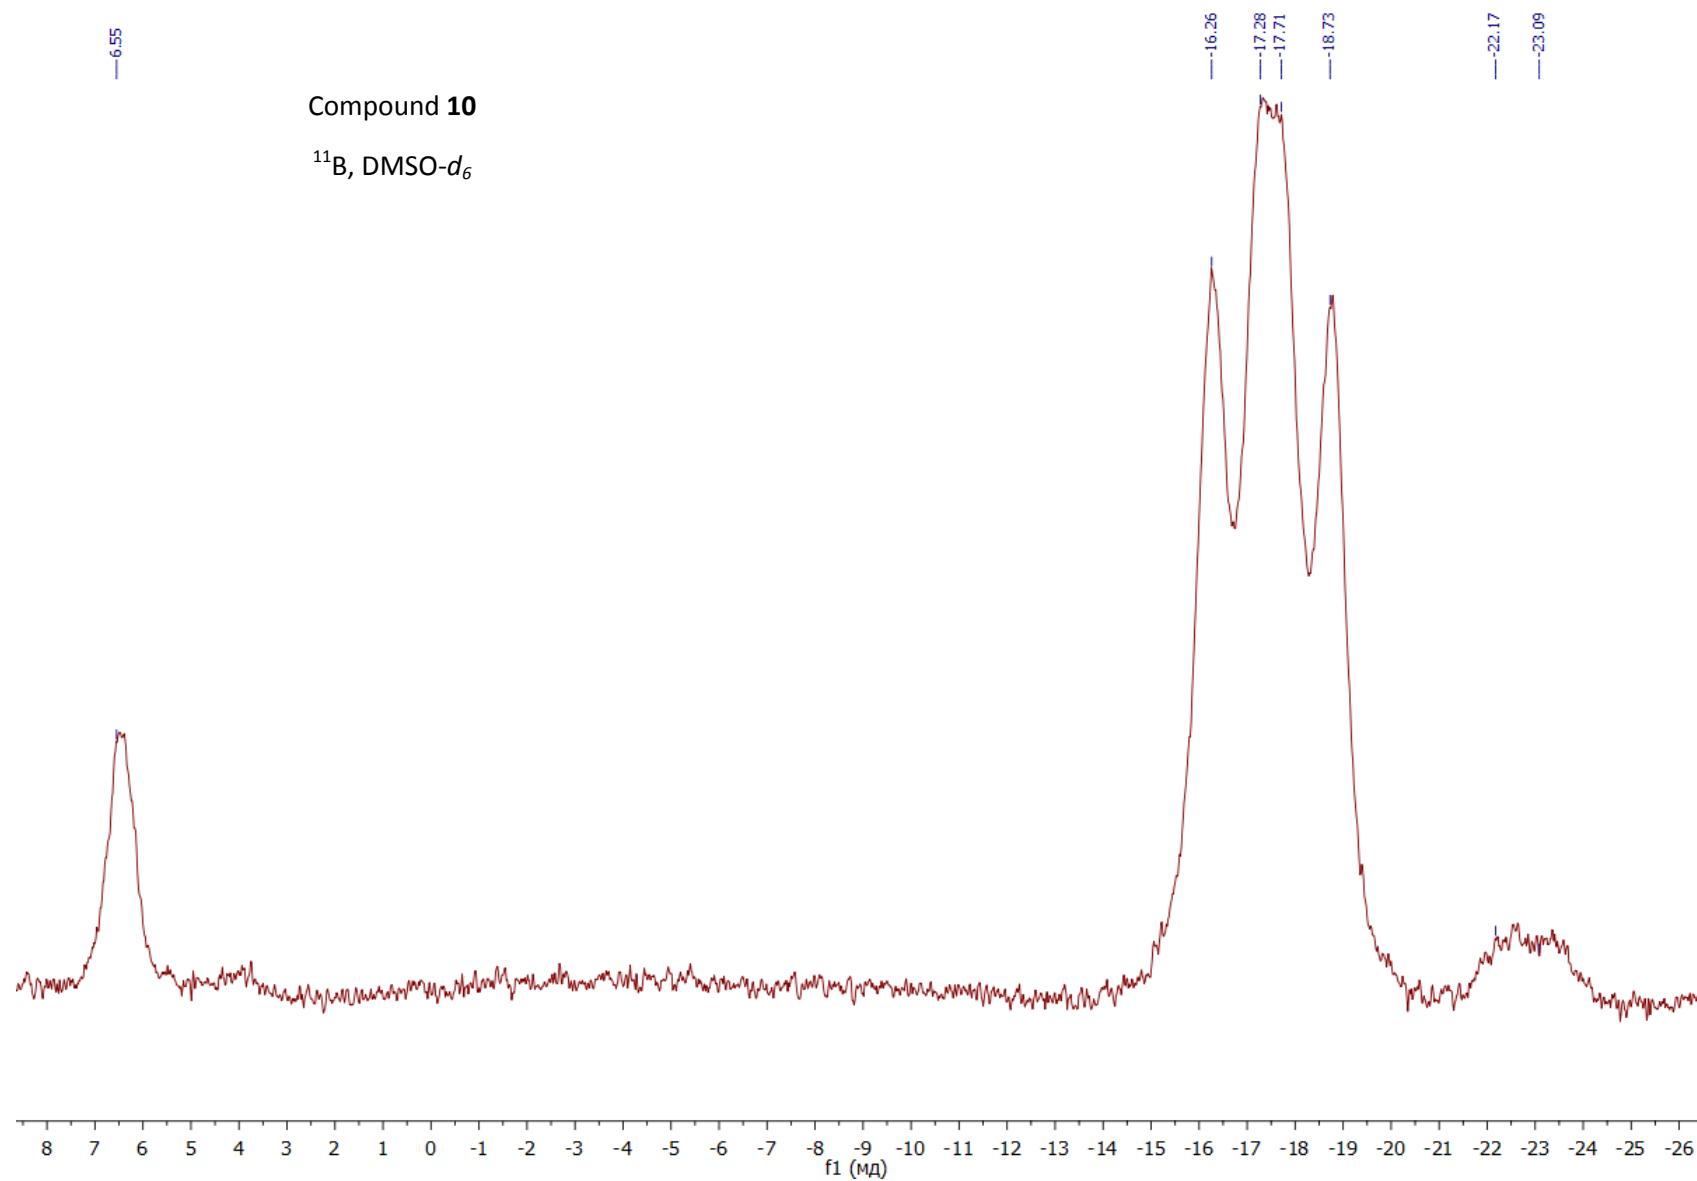

Figure S25.  $^{11}\text{B}$  NMR spectrum of compound **10**



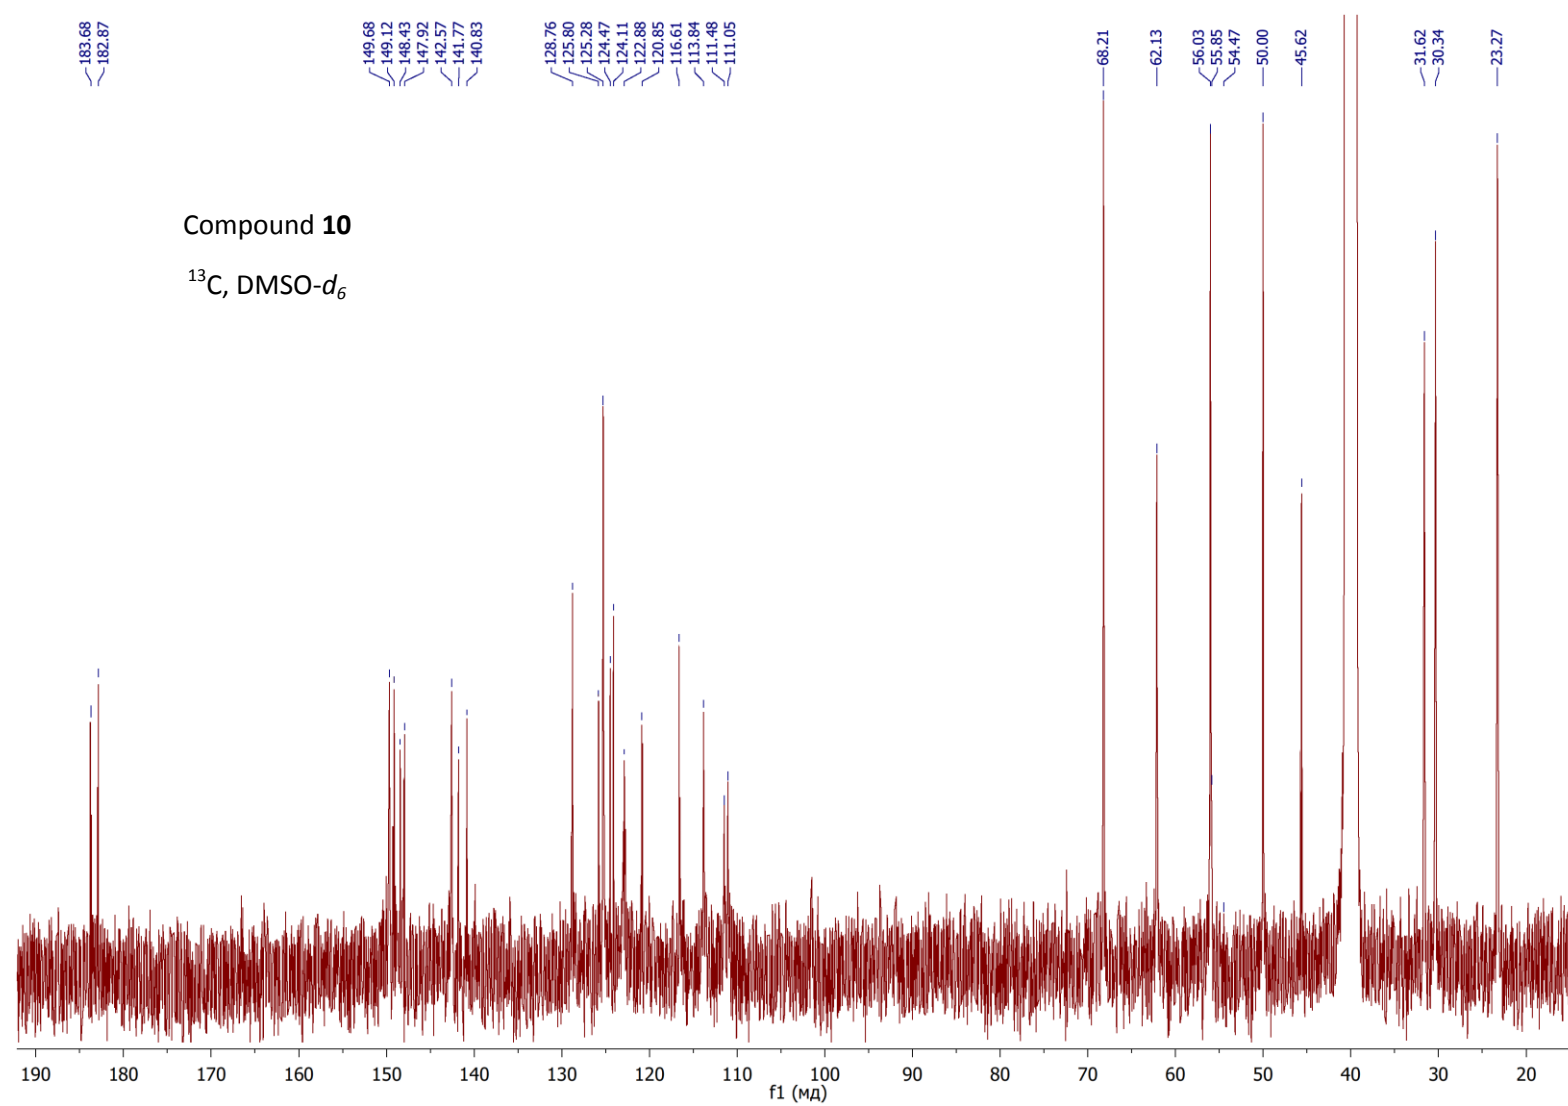

Figure S26.  $^{13}\text{C}$  NMR spectrum of compound **10**

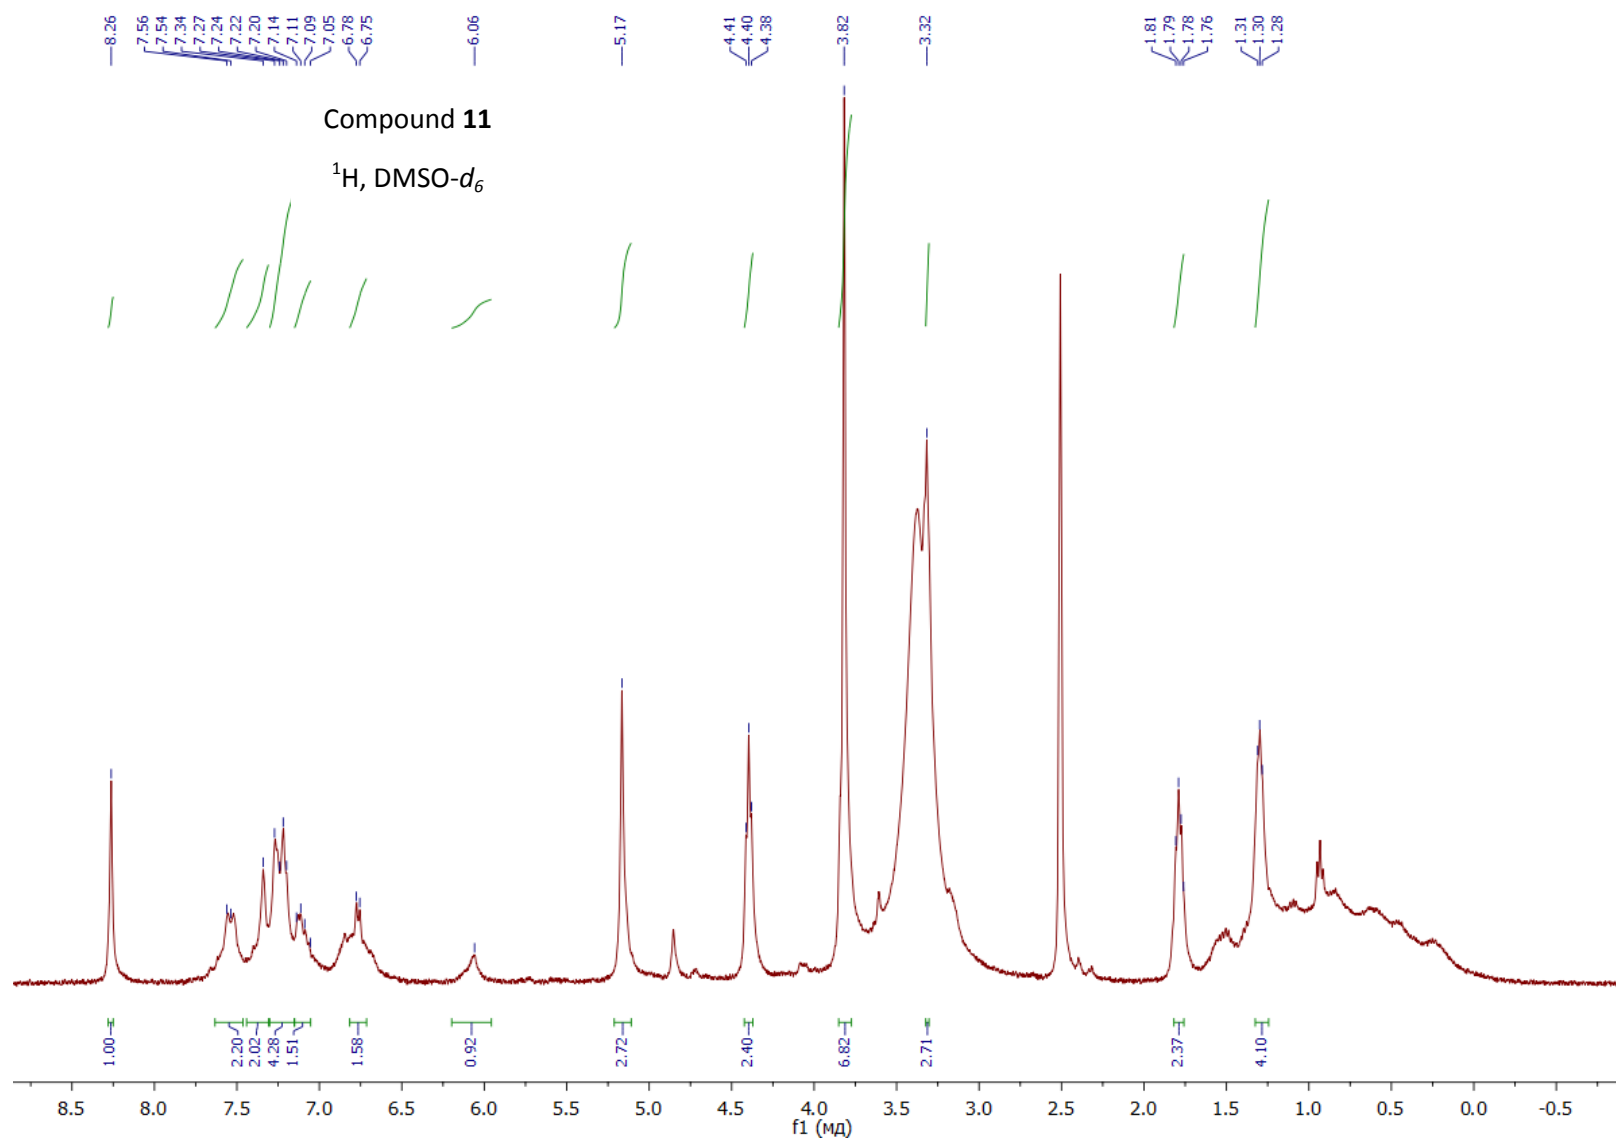

Figure S27.  $^1\text{H}$  NMR spectrum of compound **11**

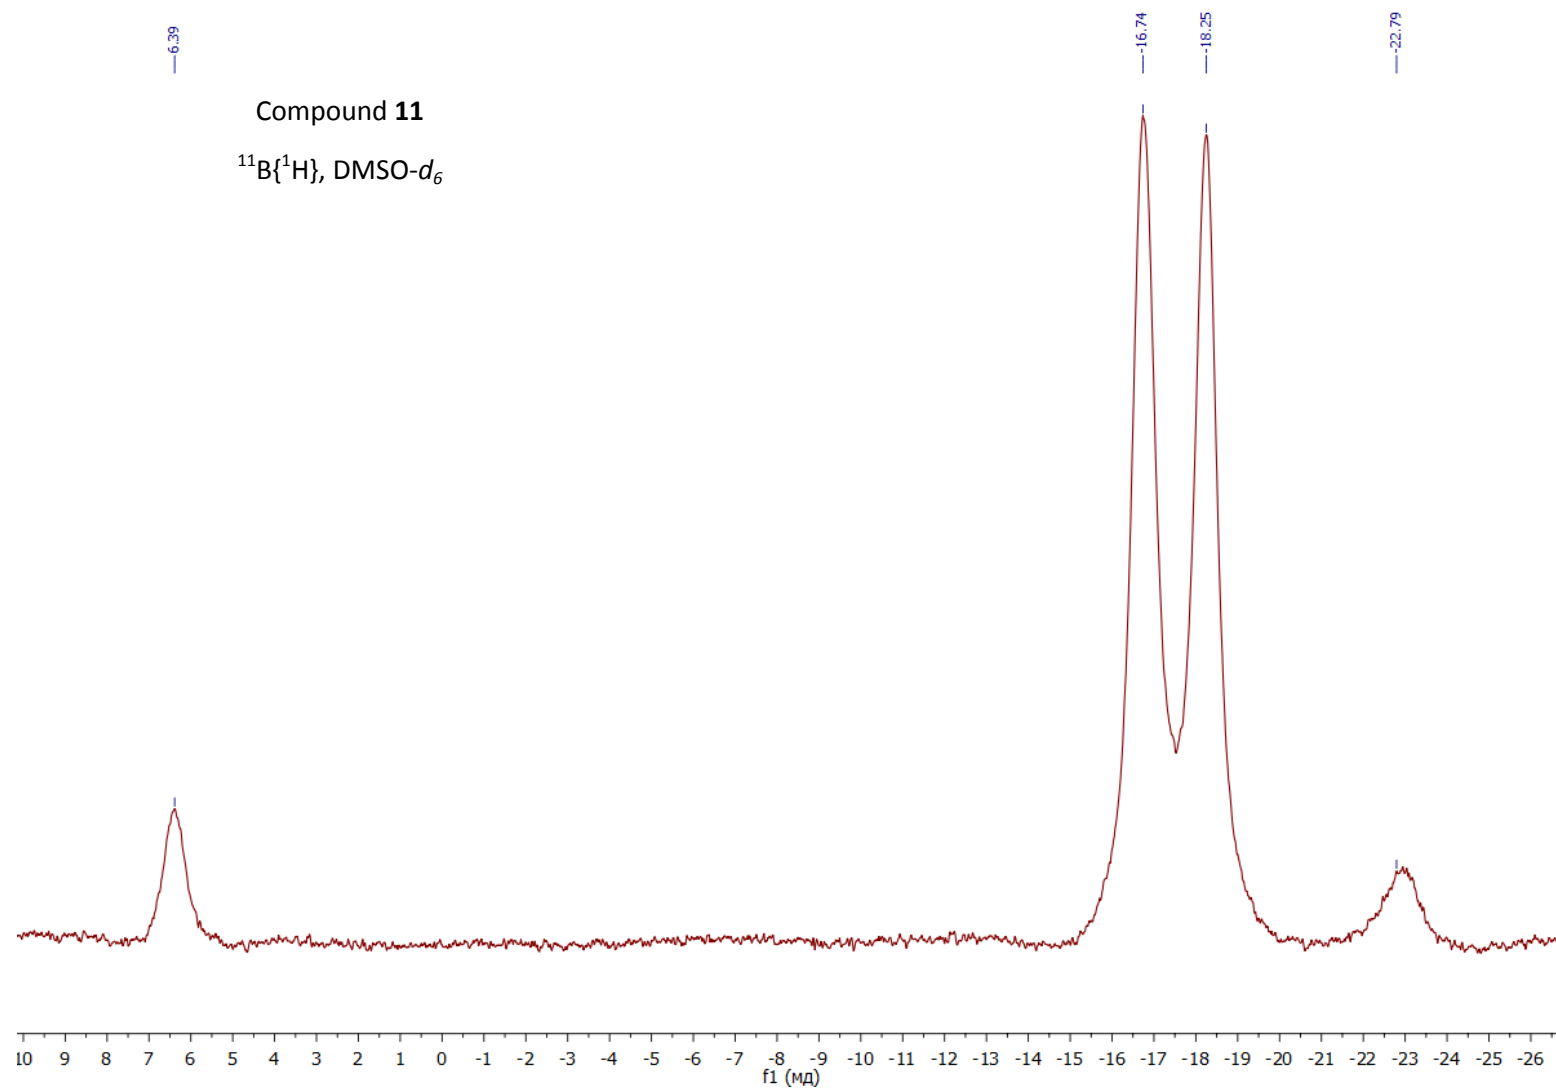

Figure S28.  $^{11}\text{B}\{^1\text{H}\}$  NMR spectrum of compound **11**

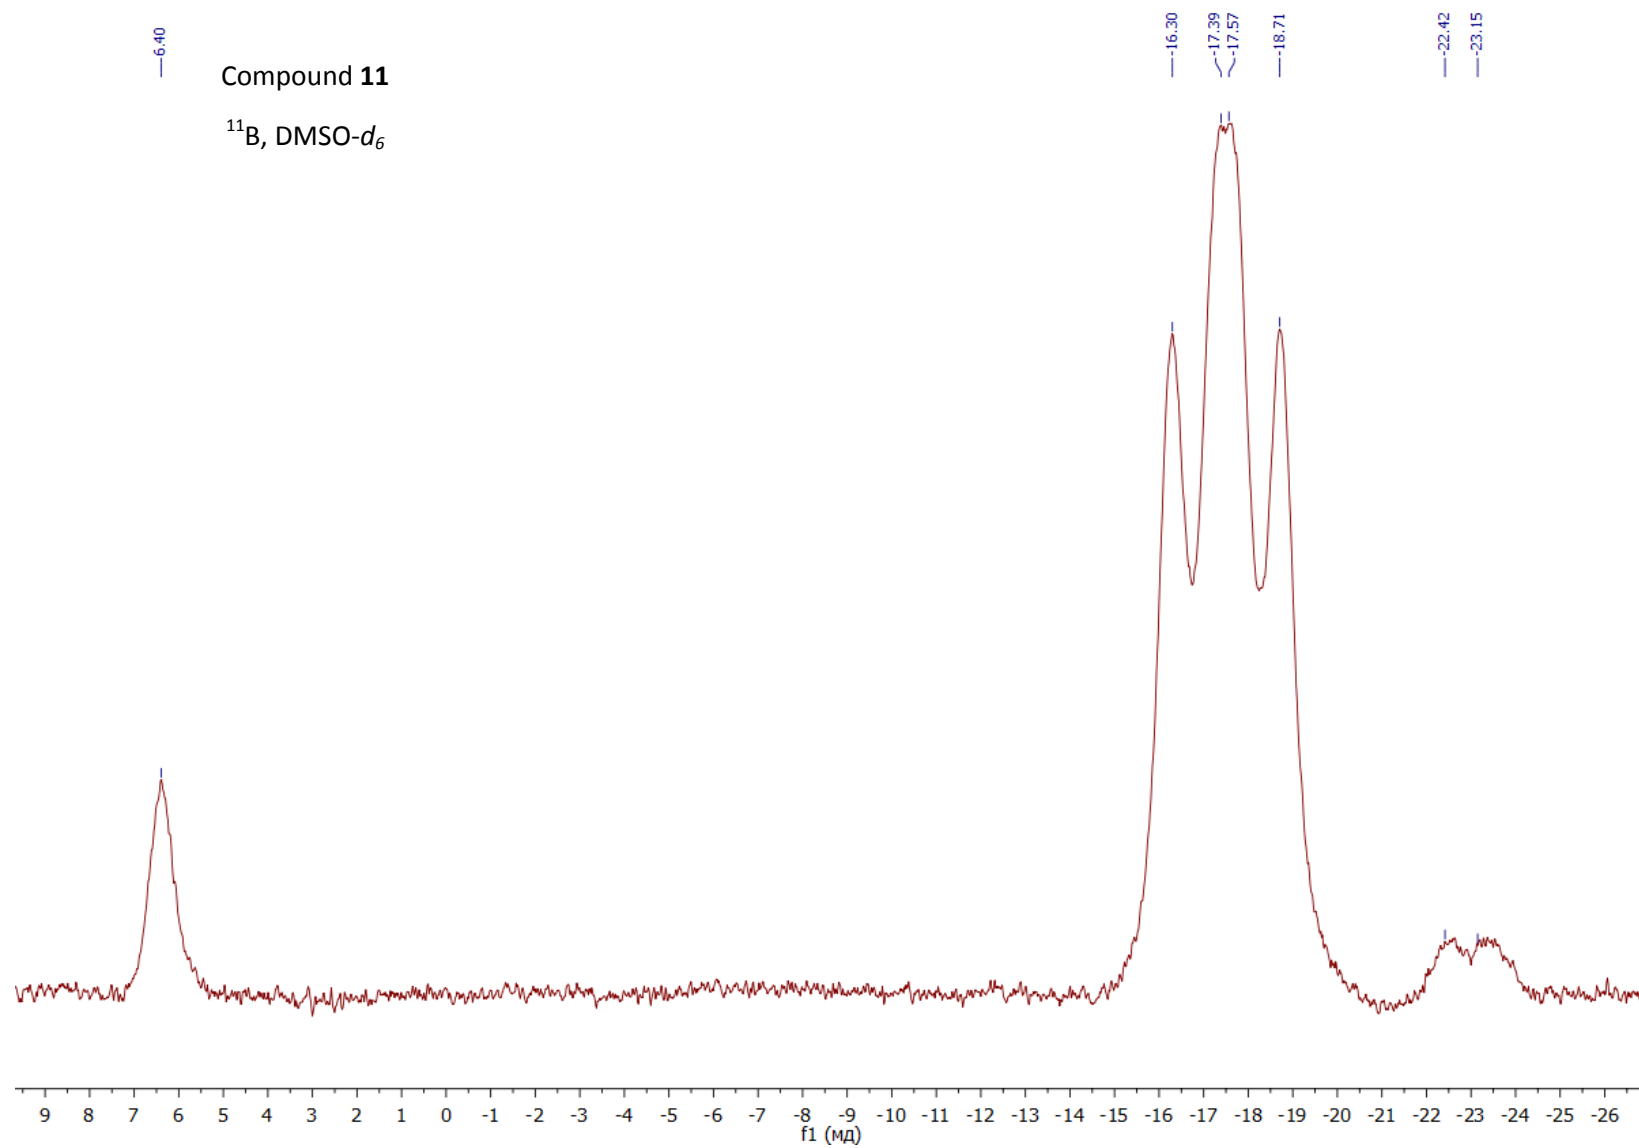

Figure S29.  $^{11}\text{B}$  NMR spectrum of compound **11**

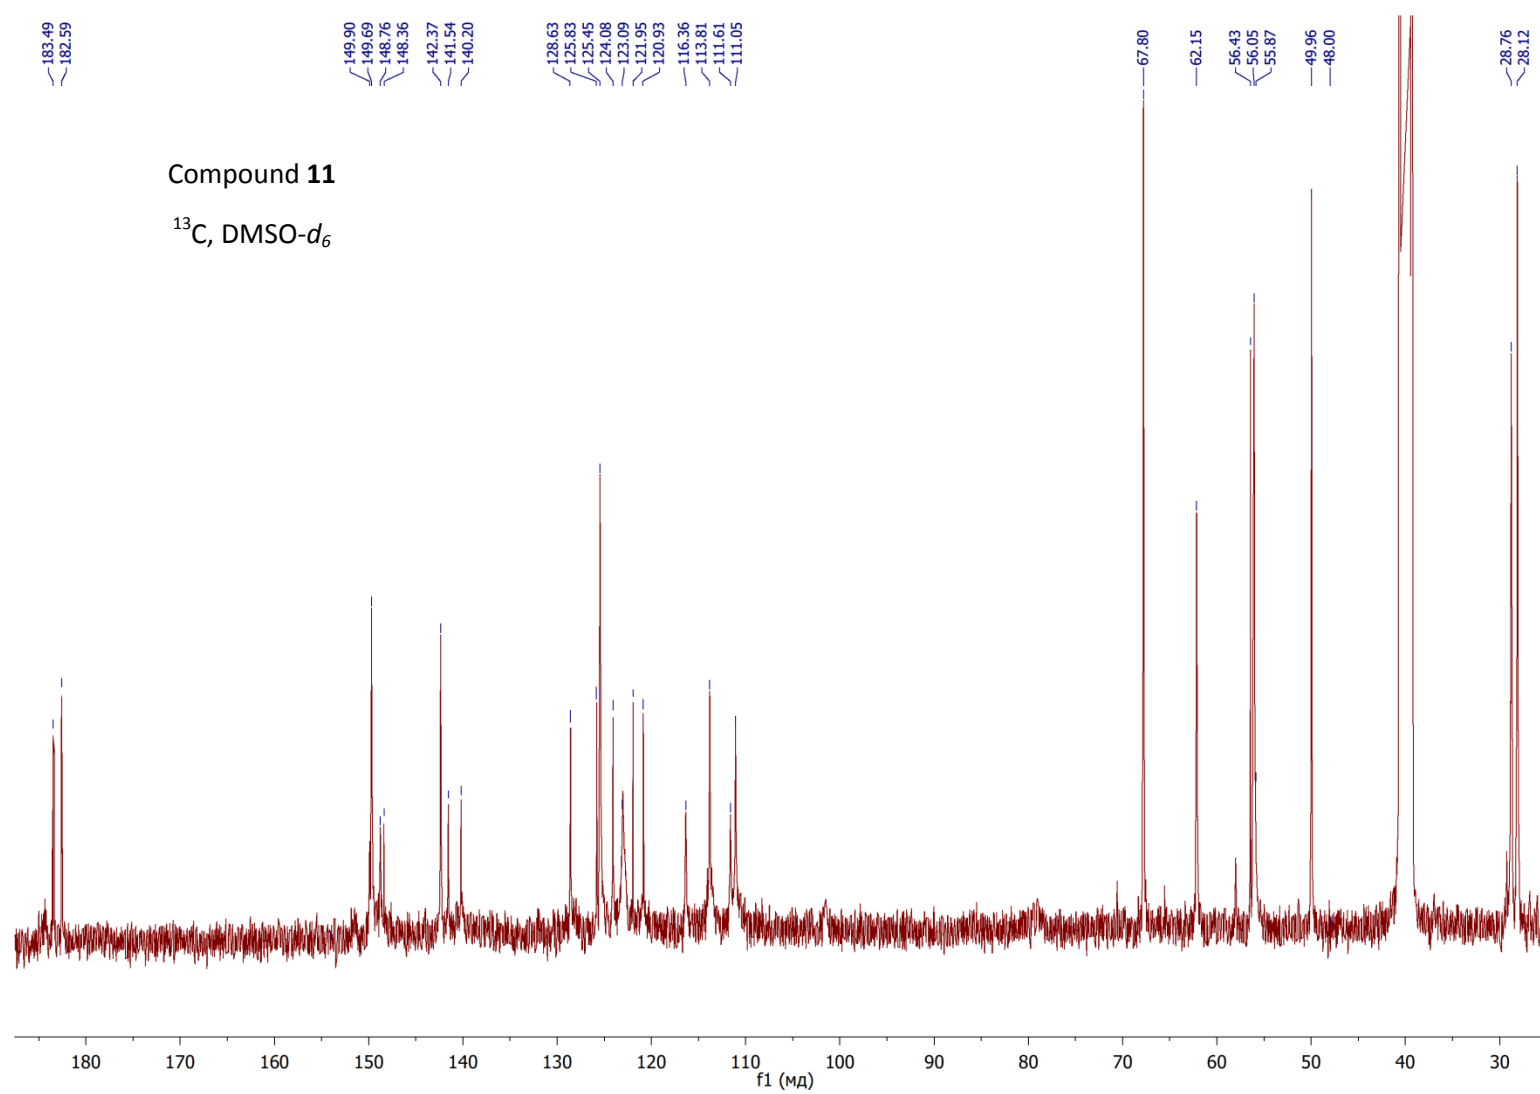

Figure S30.  $^{13}\text{C}$  NMR spectrum of compound **11**
